# Supplementary material for: Increased Microglia/Macrophage Gene Expression in a Subset of Adult and Pediatric Astrocytomas
Source: PLOS journal article supplement (doi:10.1371/journal.pone.0043339), 2012-08-22
Supplement: S2 (10.1371/journal.pone.0043339.s002) [file journal.pone.0043339.s002]

Pediatric Astrocytomas (UCSF)

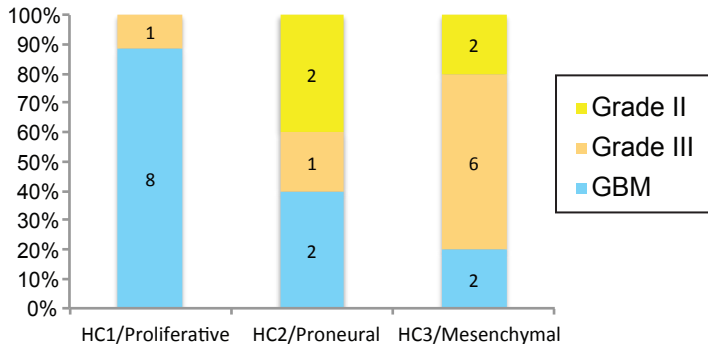Pediatric Astrocytomas (Paugh *et al*)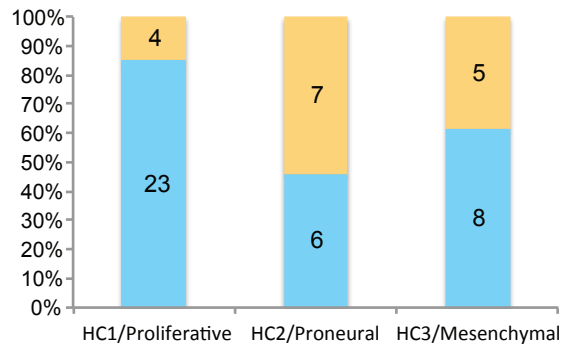

**Figure S2. Distribution of tumor grade between tumor subtypes in two pediatric astrocytoma cohorts.** The HC3/mesenchymal subgroup is predominantly Grade IV/GBM (61%) in the Paugh *et al* [11] cohort while it is more heterogeneous in the UCSF cohort with only 20% GBM.
