# Supplementary material for: Increased Microglia/Macrophage Gene Expression in a Subset of Adult and Pediatric Astrocytomas
Source: PLoS One. 2012 Aug 22;7(8):e43339. doi: 10.1371/journal.pone.0043339 (PMC3425586; doi:10.1371/journal.pone.0043339)
Supplement: Table S2 — Enrichment scores and statistics of the top 50 enriched GO gene sets from GSEA analysis of the mesenchymal versus non-mesenchymal adult and pediatric astrocytoma subtypes. (XLSX) [file pone.0043339.s008.xlsx]

## Sheet: Table S2
Table S2. Enrichment scores and statistics of the top 50 enriched GO gene sets from GSEA analysis of the mesenchymal versus non-mesenchymal adult and pediatric astrocytoma subtypes.
(A) Adult GBM (TCGA data portal, 2010): Mesenchymal subtype (n=56) vs Classical, Proneural and Neural subtypes (n=117)
NAME	Details	SIZE	ES	NES	NOM p-val	FDR q-val	FWER p-val	RANK AT MAX	LEADING EDGE
PROTEOLYSIS	Genes annotated by the GO term GO:0006508. The hydrolysis of a peptide bond or bonds within a protein.	182	0.58398	1.8997	0	0.141647	0.084	1888	tags=25%, list=10%, signal=28%
NEGATIVE_REGULATION_OF_PROTEIN_METABOLIC_PROCESS	Genes annotated by the GO term GO:0051248. Any process that stops, prevents or reduces the frequency, rate or extent of chemical reactions and pathways involving a protein.	47	0.551925	1.89429	0.00208333	0.078616	0.09	1683	tags=26%, list=9%, signal=28%
LEUKOCYTE_ACTIVATION*	Genes annotated by the GO term GO:0045321. A change in morphology and behavior of a leukocyte resulting from exposure to a specific antigen, mitogen, cytokine, cellular ligand, or soluble factor.	65	0.701244	1.88819	0	0.0555922	0.095	2303	tags=46%, list=12%, signal=52%
NEGATIVE_REGULATION_OF_CELLULAR_PROTEIN_METABOLIC_PROCESS	Genes annotated by the GO term GO:0032269. Any process that stops, prevents or reduces the frequency, rate or extent of the chemical reactions and pathways involving a protein, occurring at the level of an individual cell.	44	0.564483	1.8788	0.00210526	0.05055	0.106	1683	tags=27%, list=9%, signal=30%
LYMPHOCYTE_ACTIVATION*	Genes annotated by the GO term GO:0046649. A change in morphology and behavior of a lymphocyte resulting from exposure to a specific antigen, mitogen, cytokine, chemokine, cellular ligand, or soluble factor.	58	0.705901	1.87835	0	0.0406993	0.107	2303	tags=48%, list=12%, signal=55%
PEPTIDASE_ACTIVITY	Genes annotated by the GO term GO:0008233. Catalysis of the hydrolysis of peptide bonds.	166	0.560057	1.86479	0	0.0408043	0.121	1888	tags=26%, list=10%, signal=29%
IMMUNE_SYSTEM_PROCESS*	Genes annotated by the GO term GO:0002376. Any process involved in the development or functioning of the immune system, an organismal system for calibrated responses to potential internal or invasive threats.	317	0.704384	1.8512	0	0.0444394	0.149	2178	tags=46%, list=12%, signal=51%
CELL_ACTIVATION	Genes annotated by the GO term GO:0001775. A change in the morphology or behavior of a cell resulting from exposure to an activating factor such as a cellular or soluble ligand.	72	0.669915	1.84509	0	0.0448914	0.168	2303	tags=42%, list=12%, signal=47%
POSITIVE_REGULATION_OF_MULTICELLULAR_ORGANISMAL_PROCESS	Genes annotated by the GO term GO:0051240. Any process that activates or increases the frequency, rate or extent of an organismal process, the processes pertinent to the function of an organism above the cellular level; includes the integrated processes of tissues and organs.	63	0.681411	1.84244	0	0.0414332	0.174	2915	tags=52%, list=16%, signal=62%
MYELOID_CELL_DIFFERENTIATION*	Genes annotated by the GO term GO:0030099. The process whereby a relatively unspecialized myeloid precursor cell acquires the specialized features of any cell of the myeloid leukocyte, megakaryocyte, thrombocyte, or erythrocyte lineages.	37	0.644776	1.83771	0.00622407	0.0407554	0.19	1742	tags=41%, list=9%, signal=45%
POSITIVE_REGULATION_OF_IMMUNE_SYSTEM_PROCESS*	Genes annotated by the GO term GO:0002684. Any process that activates or increases the frequency, rate, or extent of an immune system process.	49	0.706706	1.83499	0	0.0389214	0.202	2303	tags=49%, list=12%, signal=56%
HEMOPOIETIC_OR_LYMPHOID_ORGAN_DEVELOPMENT*	Genes annotated by the GO term GO:0048534. The process whose specific outcome is the progression of any organ involved in hemopoiesis or lymphoid cell activation over time, from its formation to the mature structure. Such development includes differentiation of resident cell types (stromal cells) and of migratory cell types dependent on the unique microenvironment afforded by the organ for their …	75	0.604681	1.8347	0	0.0358256	0.203	2174	tags=36%, list=12%, signal=41%
IMMUNE_SYSTEM_DEVELOPMENT*	Genes annotated by the GO term GO:0002520. The process whose specific outcome is the progression of an organismal system whose objective is to provide calibrated responses by an organism to a potential internal or invasive threat, over time, from its formation to the mature structure. A system is a regularly interacting or interdependent group of organs or tissues that work together to carry out …	79	0.598382	1.82882	0	0.035428	0.211	2174	tags=37%, list=12%, signal=41%
HEMOPOIESIS*	Genes annotated by the GO term GO:0030097. The process whose specific outcome is the progression of the myeloid and lymphoid derived organ/tissue systems of the blood and other parts of the body over time, from formation to the mature structure. The site of hemopoiesis is variable during development, but occurs primarily in bone marrow or kidney in many adult vertebrates.	73	0.599196	1.8285	0	0.0328975	0.211	2174	tags=36%, list=12%, signal=40%
REGULATION_OF_IMMUNE_SYSTEM_PROCESS*	Genes annotated by the GO term GO:0002682. Any process that modulates the frequency, rate, or extent of an immune system process.	65	0.67333	1.82833	0	0.0307043	0.211	2915	tags=51%, list=16%, signal=60%
LEUKOCYTE_DIFFERENTIATION*	Genes annotated by the GO term GO:0002521. The process whereby a relatively unspecialized hemopoietic precursor cell acquires the specialized features of a plasmacytoid dendritic cell or any cell of the myeloid leukocyte or lymphocyte lineages.	36	0.67451	1.82812	0	0.0287853	0.211	2174	tags=42%, list=12%, signal=47%
RESPONSE_TO_EXTERNAL_STIMULUS	Genes annotated by the GO term GO:0009605. A change in state or activity of a cell or an organism (in terms of movement, secretion, enzyme production, gene expression, etc.) as a result of an external stimulus.	298	0.688276	1.82027	0	0.0310363	0.23	2227	tags=42%, list=12%, signal=47%
PROTEIN_SECRETION	Genes annotated by the GO term GO:0009306. The regulated release of proteins from a cell or group of cells.	32	0.691547	1.81366	0	0.032326	0.249	2941	tags=50%, list=16%, signal=59%
CYTOKINE_PRODUCTION*	Genes annotated by the GO term GO:0001816. The appearance of a cytokine due to biosynthesis or secretion following a cellular stimulus, resulting in an increase in its intracellular or extracellular levels.	71	0.662879	1.81188	0	0.0316	0.253	1899	tags=38%, list=10%, signal=42%
POSITIVE_REGULATION_OF_SIGNAL_TRANSDUCTION	Genes annotated by the GO term GO:0009967. Any process that activates or increases the frequency, rate or extent of signal transduction.	118	0.580303	1.80784	0.002079	0.0312761	0.259	2129	tags=37%, list=11%, signal=42%
RESPONSE_TO_WOUNDING*	Genes annotated by the GO term GO:0009611. A change in state or activity of a cell or an organism (in terms of movement, secretion, enzyme production, gene expression, etc.) as a result of a stimulus indicating damage to the organism.	181	0.725041	1.80405	0	0.0316216	0.271	2153	tags=48%, list=12%, signal=53%
REGULATION_OF_I_KAPPAB_KINASE_NF_KAPPAB_CASCADE	Genes annotated by the GO term GO:0043122. Any process that modulates an I-kappaB kinase/NF-kappaB induced cascade.	85	0.647569	1.80258	0	0.0310265	0.273	3120	tags=49%, list=17%, signal=59%
NEGATIVE_REGULATION_OF_PROGRAMMED_CELL_DEATH	Genes annotated by the GO term GO:0043069. Any process that stops, prevents or reduces the frequency, rate or extent of programmed cell death, cell death resulting from activation of endogenous cellular processes.	144	0.535359	1.79949	0.00204499	0.0309477	0.282	2726	tags=30%, list=15%, signal=35%
NEGATIVE_REGULATION_OF_APOPTOSIS	Genes annotated by the GO term GO:0043066. Any process that stops, prevents or reduces the frequency, rate or extent of cell death by apoptosis.	143	0.530534	1.79812	0.00203252	0.0303007	0.285	2726	tags=29%, list=15%, signal=34%
I_KAPPAB_KINASE_NF_KAPPAB_CASCADE	Genes annotated by the GO term GO:0007249. A series of reactions initiated by the activation of the transcription factor NF-kappaB. NF-kappaB is sequestered by the inhibitor I-kappaB, and is released when I-kappaB is phosphorylated by activated I-kappaB kinase.	105	0.607429	1.79364	0.00207039	0.0310571	0.298	3120	tags=48%, list=17%, signal=57%
LIPID_RAFT	Genes annotated by the GO term GO:0045121. Specialized membrane domains composed mainly of cholesterol and sphingolipids, and relatively poor in polyunsaturated lipids such as glycerophospholipids. The formation of these membrane domains is promoted by the presence of cholesterol in the lipid bilayer: the rigid hexagonal rings of cholesterol can pack tightly against the saturated hydrocarbon chai…	27	0.755092	1.79346	0	0.0300031	0.299	2174	tags=56%, list=12%, signal=63%
MULTI_ORGANISM_PROCESS	Genes annotated by the GO term GO:0051704. The processes by which an organism has an effect on another organism of the same or different species.	153	0.609231	1.7891	0.0021645	0.0313801	0.312	3658	tags=45%, list=20%, signal=56%
T_CELL_ACTIVATION*	Genes annotated by the GO term GO:0042110. The change in morphology and behavior of a mature or immature T cell resulting from exposure to a mitogen, cytokine, chemokine, cellular ligand, or an antigen for which it is specific.	42	0.739482	1.78805	0	0.0306212	0.317	2303	tags=50%, list=12%, signal=57%
INTERACTION_WITH_HOST	Genes annotated by the GO term GO:0051701. An interaction between two organisms living together in more or less intimate association. The term host is used for the larger (macro) of the two members of a symbiosis; the various forms of symbiosis include parasitism, commensalism and mutualism.	17	0.592016	1.78327	0.00210084	0.0320292	0.327	4322	tags=41%, list=23%, signal=54%
IMMUNE_RESPONSE*	Genes annotated by the GO term GO:0006955. Any immune system process that functions in the calibrated response of an organism to a potential internal or invasive threat.	227	0.723024	1.78152	0	0.0315018	0.329	2227	tags=49%, list=12%, signal=55%
RECEPTOR_COMPLEX	Genes annotated by the GO term GO:0043235. Any protein group composed of two or more subunits, which may or may not be identical, which undergoes combination with a hormone, neurotransmitter, drug or intracellular messenger to initiate a change in cell function.	56	0.66798	1.78144	0	0.0306	0.329	3072	tags=57%, list=17%, signal=68%
REGULATION_OF_LYMPHOCYTE_ACTIVATION*	Genes annotated by the GO term GO:0051249. Any process that modulates the frequency, rate or extent of lymphocyte activation.	33	0.723212	1.7797	0	0.0307838	0.334	2303	tags=55%, list=12%, signal=62%
RESPONSE_TO_BIOTIC_STIMULUS	Genes annotated by the GO term GO:0009607. A change in state or activity of a cell or an organism (in terms of movement, secretion, enzyme production, gene expression, etc.) as a result of a biotic stimulus, a stimulus caused or produced by a living organism.	113	0.623744	1.7788	0	0.0303977	0.34	3545	tags=50%, list=19%, signal=61%
PROTEIN_AMINO_ACID_O_LINKED_GLYCOSYLATION	Genes annotated by the GO term GO:0006493. The formation of O-glycans by addition of glycosyl groups either to the hydroxyl group of peptidyl-serine, peptidyl-threonine, peptidyl-hydroxylysine, or peptidyl-hydroxyproline, or to the phenol group of peptidyl-tyrosine.	18	0.681242	1.77665	0.00838574	0.0303189	0.347	2670	tags=44%, list=14%, signal=52%
BASOLATERAL_PLASMA_MEMBRANE	Genes annotated by the GO term GO:0016323. Part of the plasma membrane that includes the basal end and sides of the cell. Often used in reference to animal polarized epithelial membranes, where the basal membrane is the part attached to the extracellular matrix, or in plant cells, where the basal membrane is defined with respect to the zygotic axis.	33	0.665965	1.76913	0.0059761	0.0323869	0.37	1358	tags=36%, list=7%, signal=39%
ADAPTIVE_IMMUNE_RESPONSE*	Genes annotated by the GO term GO:0002250. An immune response based on directed amplification of specific receptors for antigen produced through a somatic diversification process, and allowing for enhanced response to subsequent exposures to the same antigen (immunological memory).	25	0.785218	1.76807	0	0.0320022	0.378	2381	tags=56%, list=13%, signal=64%
BLOOD_COAGULATION*	Genes annotated by the GO term GO:0007596. The sequential process by which the multiple coagulation factors of the blood interact, ultimately resulting in the formation of an insoluble fibrin clot; it may be divided into three stages: stage 1, the formation of intrinsic and extrinsic prothrombin converting principle; stage 2, the formation of thrombin; stage 3, the formation of stable fibrin poly…	41	0.720829	1.76596	0.00204918	0.0325475	0.387	2799	tags=44%, list=15%, signal=52%
POSITIVE_REGULATION_OF_I_KAPPAB_KINASE_NF_KAPPAB_CASCADE	Genes annotated by the GO term GO:0043123. Any process that activates or increases the frequency, rate or extent of an I-kappaB kinase/NF-kappaB induced cascade.	79	0.63205	1.76584	0.00619835	0.031691	0.387	3120	tags=48%, list=17%, signal=58%
POSITIVE_REGULATION_OF_IMMUNE_RESPONSE*	Genes annotated by the GO term GO:0050778. Any process that activates or increases the frequency, rate or extent of the immune response, the immunological reaction of an organism to an immunogenic stimulus.	29	0.687159	1.76404	0	0.0316163	0.393	2915	tags=52%, list=16%, signal=61%
ADAPTIVE_IMMUNE_RESPONSE_GO_0002460*	Genes annotated by the GO term GO:0002460. An immune response based on directed amplification of specific receptors for antigen produced through a somatic diversification process that includes somatic recombination of germline gene segments encoding immunoglobulin superfamily domains, and allowing for enhanced responses upon subsequent exposures to the same antigen (immunological memory). Recombi…	24	0.793521	1.76332	0	0.0310477	0.393	2178	tags=54%, list=12%, signal=61%
REGULATION_OF_BODY_FLUID_LEVELS	Genes annotated by the GO term GO:0050878. Any process that modulates the levels of body fluids.	55	0.644543	1.76167	0	0.0313191	0.398	2799	tags=35%, list=15%, signal=41%
HEMOSTASIS	Genes annotated by the GO term GO:0007599. The stopping of bleeding (loss of body fluid) or the arrest of the circulation to an organ or part.	46	0.693974	1.76108	0.00205761	0.030646	0.398	2799	tags=41%, list=15%, signal=48%
INFLAMMATORY_RESPONSE*	Genes annotated by the GO term GO:0006954. The immediate defensive reaction (by vertebrate tissue) to infection or injury caused by chemical or physical agents. The process is characterized by local vasodilation, extravasation of plasma into intercellular spaces and accumulation of white blood cells and macrophages.	122	0.749323	1.76064	0	0.030189	0.399	2147	tags=54%, list=12%, signal=61%
NEGATIVE_REGULATION_OF_DEVELOPMENTAL_PROCESS	Genes annotated by the GO term GO:0051093. Any process that stops, prevents or reduces the rate or extent of development, the biological process whose specific outcome is the progression of an organism over time from an initial condition (e.g. a zygote, or a young adult) to a later condition (e.g. a multicellular animal or an aged adult).	188	0.48331	1.75706	0.00406504	0.0305199	0.41	2726	tags=28%, list=15%, signal=32%
REGULATION_OF_IMMUNE_RESPONSE*	Genes annotated by the GO term GO:0050776. Any process that modulates the frequency, rate or extent of the immune response, the immunological reaction of an organism to an immunogenic stimulus.	33	0.657004	1.75652	0	0.030005	0.41	2915	tags=45%, list=16%, signal=54%
B_CELL_ACTIVATION*	Genes annotated by the GO term GO:0042113. The change in morphology and behavior of a mature or immature B cell resulting from exposure to a mitogen, cytokine, chemokine, cellular ligand, or an antigen for which it is specific.	19	0.748135	1.75333	0	0.0303445	0.413	2178	tags=53%, list=12%, signal=60%
DEFENSE_RESPONSE*	Genes annotated by the GO term GO:0006952. Reactions, triggered in response to the presence of a foreign body or the occurrence of an injury, which result in restriction of damage to the organism attacked or prevention/recovery from the infection caused by the attack.	257	0.682025	1.74819	0	0.0319626	0.432	2868	tags=54%, list=15%, signal=63%
ENDOPEPTIDASE_ACTIVITY	Genes annotated by the GO term GO:0004175. Catalysis of the hydrolysis of nonterminal peptide linkages in oligopeptides or polypeptides, and comprising any enzyme of sub-subclasses EC:3.4.21-99. They are classfied according to the presence of essential catalytic residues or ions at their active sites.	110	0.524201	1.74805	0.00632911	0.0313572	0.432	1502	tags=24%, list=8%, signal=26%
RESPONSE_TO_OTHER_ORGANISM	Genes annotated by the GO term GO:0051707. A change in state or activity of a cell or an organism (in terms of movement, secretion, enzyme production, gene expression, etc.) as a result of a stimulus from another living organism.	78	0.670808	1.74795	0	0.0307687	0.432	3545	tags=56%, list=19%, signal=69%
COAGULATION*	Genes annotated by the GO term GO:0050817. The process by which a fluid solution, or part of it, changes into a solid or semisolid mass.	42	0.710865	1.74644	0	0.0307908	0.441	2799	tags=43%, list=15%, signal=50%
(B) Pediatric Astrocytoma (Paugh et al. 2010): HC3/Mesenchymal subtype (n=13) vs HC1/Proliferative and HC2/Proneural subtypes (n=40)
NAME	Details	SIZE	ES	NES	NOM p-val	FDR q-val	FWER p-val	RANK AT MAX	LEADING EDGE
I_KAPPAB_KINASE_NF_KAPPAB_CASCADE	Genes annotated by the GO term GO:0007249. A series of reactions initiated by the activation of the transcription factor NF-kappaB. NF-kappaB is sequestered by the inhibitor I-kappaB, and is released when I-kappaB is phosphorylated by activated I-kappaB kinase.	105	0.659577	1.90578	0	0.263471	0.105	3393	tags=47%, list=16%, signal=56%
REGULATION_OF_I_KAPPAB_KINASE_NF_KAPPAB_CASCADE	Genes annotated by the GO term GO:0043122. Any process that modulates an I-kappaB kinase/NF-kappaB induced cascade.	84	0.669222	1.85593	0	0.287807	0.221	3539	tags=49%, list=17%, signal=59%
POSITIVE_REGULATION_OF_I_KAPPAB_KINASE_NF_KAPPAB_CASCADE	Genes annotated by the GO term GO:0043123. Any process that activates or increases the frequency, rate or extent of an I-kappaB kinase/NF-kappaB induced cascade.	78	0.675555	1.84944	0	0.211768	0.241	3539	tags=49%, list=17%, signal=59%
INTRAMOLECULAR_OXIDOREDUCTASE_ACTIVITY	Genes annotated by the GO term GO:0016860. Catalysis of an oxidation-reduction (redox) reaction in which the hydrogen donor and acceptor are the same molecule, and no oxidized product appears.	18	0.620685	1.79539	0.00199601	0.293637	0.387	2393	tags=33%, list=12%, signal=38%
NUCLEAR_ENVELOPE_ENDOPLASMIC_RETICULUM_NETWORK	Genes annotated by the GO term GO:0042175. The continuous network of membranes encompassing the outer nuclear membrane and the endoplasmic reticulum.	91	0.517191	1.79336	0.00813008	0.242854	0.396	3765	tags=45%, list=18%, signal=55%
PROTEIN_SECRETION	Genes annotated by the GO term GO:0009306. The regulated release of proteins from a cell or group of cells.	32	0.67429	1.78449	0	0.229711	0.439	2824	tags=38%, list=14%, signal=43%
IMMUNE_EFFECTOR_PROCESS*	Genes annotated by the GO term GO:0002252. Any process of the immune system that occurs as part of an immune response.	36	0.617781	1.78383	0.002	0.197712	0.439	3539	tags=36%, list=17%, signal=43%
PEPTIDYL_AMINO_ACID_MODIFICATION	Genes annotated by the GO term GO:0018193. The alteration of an amino acid residue in a peptide.	56	0.514182	1.77012	0.00198413	0.205917	0.488	3937	tags=34%, list=19%, signal=42%
ESTABLISHMENT_OF_PROTEIN_LOCALIZATION	Genes annotated by the GO term GO:0045184. The directed movement of a protein to a specific location.	182	0.457498	1.74924	0	0.238866	0.564	3556	tags=34%, list=17%, signal=41%
PROTEIN_BINDING_BRIDGING	Genes annotated by the GO term GO:0030674. Interacting selectively with two or more protein molecules, or a protein and another macromolecule or complex, simultaneously, thereby physically linking the bound proteins or complexes to each other.	58	0.539258	1.74895	0	0.215971	0.564	2223	tags=22%, list=11%, signal=25%
ENDOPLASMIC_RETICULUM_MEMBRANE	Genes annotated by the GO term GO:0005789. The lipid bilayer surrounding the endoplasmic reticulum.	82	0.532454	1.74727	0.0101626	0.199618	0.569	3756	tags=48%, list=18%, signal=58%
POSITIVE_REGULATION_OF_SIGNAL_TRANSDUCTION	Genes annotated by the GO term GO:0009967. Any process that activates or increases the frequency, rate or extent of signal transduction.	116	0.583669	1.73875	0	0.202835	0.608	2821	tags=37%, list=14%, signal=43%
CYSTEINE_TYPE_ENDOPEPTIDASE_ACTIVITY	Genes annotated by the GO term GO:0004197. Catalysis of the hydrolysis of nonterminal peptide linkages in oligopeptides or polypeptides; a cysteine residue is at the active center.	39	0.610412	1.73767	0.0020202	0.18933	0.608	2285	tags=33%, list=11%, signal=37%
ENDOPLASMIC_RETICULUM_PART	Genes annotated by the GO term GO:0044432. Any constituent part of the endoplasmic reticulum, the irregular network of unit membranes, visible only by electron microscopy, that occurs in the cytoplasm of many eukaryotic cells. The membranes form a complex meshwork of tubular channels, which are often expanded into slitlike cavities called cisternae.	92	0.54213	1.73534	0.0125261	0.180241	0.614	4566	tags=55%, list=22%, signal=71%
PROTEIN_TRANSPORT	Genes annotated by the GO term GO:0015031. The directed movement of proteins into, out of, within or between cells.	150	0.462996	1.72682	0.0038835	0.184601	0.639	3556	tags=35%, list=17%, signal=42%
RESPONSE_TO_OTHER_ORGANISM	Genes annotated by the GO term GO:0051707. A change in state or activity of a cell or an organism (in terms of movement, secretion, enzyme production, gene expression, etc.) as a result of a stimulus from another living organism.	80	0.62687	1.72609	0.0039604	0.174132	0.641	1994	tags=29%, list=10%, signal=32%
IMMUNE_RESPONSE*	Genes annotated by the GO term GO:0006955. Any immune system process that functions in the calibrated response of an organism to a potential internal or invasive threat.	226	0.631234	1.71333	0	0.188177	0.672	2995	tags=38%, list=14%, signal=44%
INTRACELLULAR_PROTEIN_TRANSPORT	Genes annotated by the GO term GO:0006886. The directed movement of proteins in a cell, including the movement of proteins between specific compartments or structures within a cell, such as organelles of a eukaryotic cell.	138	0.459412	1.71123	0.00394477	0.181777	0.679	4851	tags=43%, list=23%, signal=56%
CYSTEINE_TYPE_PEPTIDASE_ACTIVITY	Genes annotated by the GO term GO:0008234. Catalysis of the hydrolysis of peptide linkages in oligopeptides or polypeptides; a cysteine residue is at the active center.	53	0.562359	1.70335	0.0040568	0.188865	0.701	2879	tags=34%, list=14%, signal=39%
PEPTIDYL_TYROSINE_PHOSPHORYLATION	Genes annotated by the GO term GO:0018108. The posttranslational phosphorylation of peptidyl-tyrosine to form peptidyl-O4'-phospho-L-tyrosine.	26	0.593369	1.70192	0.00980392	0.182265	0.705	3937	tags=35%, list=19%, signal=43%
PROTEIN_LOCALIZATION	Genes annotated by the GO term GO:0008104. The processes by which a protein is transported to, or maintained in, a specific location.	206	0.42914	1.6972	0	0.184614	0.726	3556	tags=32%, list=17%, signal=38%
JAK_STAT_CASCADE	Genes annotated by the GO term GO:0007259. The processes by which STAT proteins (Signal Transducers and Activators of Transcription) are activated by members of the JAK (janus activated kinase) family of tyrosine kinases, following the binding of cytokines to their cognate receptor. Once activated, STATs dimerize and translocate to the nucleus and modulate the expression of target genes.	31	0.694269	1.696	0.00630252	0.1788	0.732	2607	tags=48%, list=13%, signal=55%
BLOOD_COAGULATION*	Genes annotated by the GO term GO:0007596. The sequential process by which the multiple coagulation factors of the blood interact, ultimately resulting in the formation of an insoluble fibrin clot; it may be divided into three stages: stage 1, the formation of intrinsic and extrinsic prothrombin converting principle; stage 2, the formation of thrombin; stage 3, the formation of stable fibrin poly…	42	0.611602	1.69395	0.00804829	0.175277	0.739	3425	tags=40%, list=17%, signal=48%
HYDROLASE_ACTIVITY_ACTING_ON_GLYCOSYL_BONDS	Genes annotated by the GO term GO:0016798. Catalysis of the hydrolysis of any glycosyl bond.	44	0.591286	1.68857	0.00798403	0.177691	0.757	3907	tags=45%, list=19%, signal=56%
RESPONSE_TO_WOUNDING*	Genes annotated by the GO term GO:0009611. A change in state or activity of a cell or an organism (in terms of movement, secretion, enzyme production, gene expression, etc.) as a result of a stimulus indicating damage to the organism.	179	0.611644	1.68531	0.00212314	0.176487	0.768	3250	tags=42%, list=16%, signal=50%
POSITIVE_REGULATION_OF_CYTOKINE_BIOSYNTHETIC_PROCESS*	Genes annotated by the GO term GO:0042108. Any process that activates or increases the frequency, rate or extent of the chemical reactions and pathways resulting in the formation of cytokines.	24	0.698757	1.68209	0.0041841	0.174756	0.774	1994	tags=29%, list=10%, signal=32%
HEMOSTASIS	Genes annotated by the GO term GO:0007599. The stopping of bleeding (loss of body fluid) or the arrest of the circulation to an organ or part.	47	0.581261	1.68133	0.0102669	0.169313	0.777	3683	tags=38%, list=18%, signal=46%
PEPTIDYL_TYROSINE_MODIFICATION	Genes annotated by the GO term GO:0018212. The modification of peptidyl-tyrosine.	28	0.598533	1.67919	0.00994036	0.166623	0.782	3937	tags=36%, list=19%, signal=44%
COAGULATION*	Genes annotated by the GO term GO:0050817. The process by which a fluid solution, or part of it, changes into a solid or semisolid mass.	43	0.605739	1.67773	0.00601202	0.163646	0.786	3425	tags=40%, list=17%, signal=47%
SKELETAL_DEVELOPMENT	Genes annotated by the GO term GO:0001501. The process whose specific outcome is the progression of the skeleton over time, from its formation to the mature structure. The skeleton is the bony framework of the body in vertebrates (endoskeleton) or the hard outer envelope of insects (exoskeleton or dermoskeleton).	101	0.573759	1.67746	0.00448431	0.158389	0.786	2018	tags=32%, list=10%, signal=35%
REGULATION_OF_SIGNAL_TRANSDUCTION	Genes annotated by the GO term GO:0009966. Any process that modulates the frequency, rate or extent of signal transduction.	208	0.482281	1.67458	0.00207039	0.157739	0.792	2821	tags=30%, list=14%, signal=34%
RESPONSE_TO_BIOTIC_STIMULUS	Genes annotated by the GO term GO:0009607. A change in state or activity of a cell or an organism (in terms of movement, secretion, enzyme production, gene expression, etc.) as a result of a biotic stimulus, a stimulus caused or produced by a living organism.	115	0.560185	1.67428	0.00409836	0.153572	0.792	3439	tags=34%, list=17%, signal=40%
PROTEASE_INHIBITOR_ACTIVITY	Genes annotated by the GO term GO:0030414. Stops, prevents or reduces the activity of a protease, any enzyme catalyzes the hydrolysis peptide bonds.	41	0.611996	1.67403	0.00587084	0.149357	0.793	2971	tags=34%, list=14%, signal=40%
NITROGEN_COMPOUND_BIOSYNTHETIC_PROCESS	Genes annotated by the GO term GO:0044271. The chemical reactions and pathways resulting in the formation of organic and inorganic nitrogenous compounds.	25	0.657827	1.66852	0.00617284	0.153526	0.812	4235	tags=48%, list=20%, signal=60%
POSITIVE_REGULATION_OF_IMMUNE_RESPONSE*	Genes annotated by the GO term GO:0050778. Any process that activates or increases the frequency, rate or extent of the immune response, the immunological reaction of an organism to an immunogenic stimulus.	28	0.635812	1.6649	0.00869565	0.155599	0.82	3539	tags=39%, list=17%, signal=47%
SENSORY_PERCEPTION_OF_CHEMICAL_STIMULUS	Genes annotated by the GO term GO:0007606. The series of events required for an organism to receive a sensory chemical stimulus, convert it to a molecular signal, and recognize and characterize the signal.	17	0.602229	1.66288	0.00408163	0.154817	0.827	1882	tags=18%, list=9%, signal=19%
WOUND_HEALING*	Genes annotated by the GO term GO:0042060. The series of events that restore integrity to a damaged tissue, following an injury.	53	0.561019	1.65876	0.00414938	0.157631	0.837	3425	tags=36%, list=17%, signal=43%
CYTOKINE_PRODUCTION*	Genes annotated by the GO term GO:0001816. The appearance of a cytokine due to biosynthesis or secretion following a cellular stimulus, resulting in an increase in its intracellular or extracellular levels.	71	0.571161	1.65849	0.00422833	0.1539	0.838	3106	tags=37%, list=15%, signal=43%
PEROXISOME_ORGANIZATION_AND_BIOGENESIS	Genes annotated by the GO term GO:0007031. A process that is carried out at the cellular level which results in the formation, arrangement of constituent parts, or disassembly of a peroxisome.	15	0.554262	1.65754	0.027027	0.151661	0.841	4851	tags=47%, list=23%, signal=61%
TISSUE_DEVELOPMENT	Genes annotated by the GO term GO:0009888. The process whose specific outcome is the progression of a tissue over time, from its formation to the mature structure.	135	0.471899	1.65553	0.004158	0.151508	0.843	2945	tags=24%, list=14%, signal=28%
IMMUNE_SYSTEM_PROCESS*	Genes annotated by the GO term GO:0002376. Any process involved in the development or functioning of the immune system, an organismal system for calibrated responses to potential internal or invasive threats.	319	0.572843	1.65517	0.00609756	0.148369	0.844	3439	tags=37%, list=17%, signal=44%
RECEPTOR_COMPLEX	Genes annotated by the GO term GO:0043235. Any protein group composed of two or more subunits, which may or may not be identical, which undergoes combination with a hormone, neurotransmitter, drug or intracellular messenger to initiate a change in cell function.	54	0.63553	1.65333	0.01	0.147631	0.846	2469	tags=35%, list=12%, signal=40%
CYTOKINE_SECRETION*	Genes annotated by the GO term GO:0050663. The regulated release of cytokines from a cell or group of cells. Cytokines are any of a group of proteins that function to control the survival, growth and differentiation of tissues and cells, and which have autocrine and paracrine activity.	18	0.67241	1.65008	0.00863931	0.14919	0.85	2433	tags=33%, list=12%, signal=38%
POSITIVE_REGULATION_OF_TRANSLATION	Genes annotated by the GO term GO:0045727. Any process that activates or increases the frequency, rate or extent of the chemical reactions and pathways resulting in the formation of proteins by the translation of mRNA.	33	0.626591	1.64869	0.00204082	0.148175	0.855	2283	tags=27%, list=11%, signal=31%
RESPONSE_TO_VIRUS	Genes annotated by the GO term GO:0009615. A change in state or activity of a cell or an organism (in terms of movement, secretion, enzyme production, gene expression, etc.) as a result of a stimulus from a virus.	49	0.661611	1.64538	0.0162272	0.150119	0.861	1892	tags=35%, list=9%, signal=38%
REGULATION_OF_TRANSLATION	Genes annotated by the GO term GO:0006417. Any process that modulates the frequency, rate or extent of the chemical reactions and pathways resulting in the formation of proteins by the translation of mRNA.	89	0.427753	1.64492	0.00420168	0.147571	0.862	3787	tags=26%, list=18%, signal=31%
PROGRAMMED_CELL_DEATH	Genes annotated by the GO term GO:0012501. Cell death resulting from activation of endogenous cellular processes.	415	0.435345	1.64348	0	0.146763	0.867	3335	tags=30%, list=16%, signal=35%
ADAPTIVE_IMMUNE_RESPONSE*	Genes annotated by the GO term GO:0002250. An immune response based on directed amplification of specific receptors for antigen produced through a somatic diversification process, and allowing for enhanced response to subsequent exposures to the same antigen (immunological memory).	25	0.695212	1.64071	0.0103734	0.14861	0.871	3539	tags=44%, list=17%, signal=53%
CYTOKINE_BIOSYNTHETIC_PROCESS*	Genes annotated by the GO term GO:0042089. The chemical reactions and pathways resulting in the formation of cytokines, any of a group of proteins that function to control the survival, growth and differentiation of tissues and cells, and which have autocrine and paracrine activity.	40	0.646811	1.63681	0.00617284	0.151721	0.873	3106	tags=38%, list=15%, signal=44%
REGULATION_OF_PROTEIN_AMINO_ACID_PHOSPHORYLATION	Genes annotated by the GO term GO:0001932. Any process that modulates the frequency, rate or extent of addition of phosphate groups into an amino acid in a protein.	29	0.545002	1.6362	0.00965251	0.149488	0.874	5157	tags=41%, list=25%, signal=55%
DEFENSE_RESPONSE*	Genes annotated by the GO term GO:0006952. Reactions, triggered in response to the presence of a foreign body or the occurrence of an injury, which result in restriction of damage to the organism attacked or prevention/recovery from the infection caused by the attack.	252	0.604402	1.63594	0.0126582	0.146872	0.874	3249	tags=39%, list=16%, signal=46%
PROTEIN_TARGETING	Genes annotated by the GO term GO:0006605. The process of targeting specific proteins to particular membrane-bound subcellular organelles. Usually requires an organelle specific protein sequence motif.	103	0.45932	1.6354	0.0040568	0.144927	0.874	3556	tags=31%, list=17%, signal=37%
APOPTOSIS_GO	Genes annotated by the GO term GO:0006915. A form of programmed cell death induced by external or internal signals that trigger the activity of proteolytic caspases, whose actions dismantle the cell and result in cell death. Apoptosis begins internally with condensation and subsequent fragmentation of the cell nucleus (blebbing) while the plasma membrane remains intact. Other characteristics of a…	414	0.432275	1.63443	0.0021322	0.14379	0.877	3335	tags=30%, list=16%, signal=35%
Abbreviations: ES: enrichment score; NES: normalized enrichment score; NOM p-val: nominal p-value; FDR q-val = false discovery rate q-value; FWER p-val: Family-wise error rate p-value
Red text = gene sets with FDR of >25% and hence were excluded from analysis
* Defense/Immune Response related gene sets
