# Supplementary material for: Increased Microglia/Macrophage Gene Expression in a Subset of Adult and Pediatric Astrocytomas
Source: PLoS One. 2012 Aug 22;7(8):e43339. doi: 10.1371/journal.pone.0043339 (PMC3425586; doi:10.1371/journal.pone.0043339)
Supplement: Table S4 — Enrichment scores and statistics of cell-specific gene signatures from GSEA analysis of the mesenchymal versus non-mesenchymal subtypes in adult and pediatric astrocytomas. (XLSX) [file pone.0043339.s010.xlsx]

## Sheet: Table S4
Table S4. Enrichment scores and statistics of cell-specific gene signatures from GSEA analysis of the mesenchymal versus non-mesenchymal subtypes in adult and pediatric astrocytomas.
(A) Adult GBM (TCGA data portal, 2010): Mesenchymal subtype (n=56) vs Classical, Proneural and Neural subtypes (n=117)
NAME	SIZE	ES	NES	NOM p-val	FDR q-val	FWER p-val	RANK AT MAX	LEADING EDGE
MONOCYTES	76	0.593492	1.64744	0.00816326	0.0323677	0.029	3125	tags=47%, list=17%, signal=57%
M2 MACROPHAGES	57	0.78393	1.64382	0	0.0169485	0.03	2804	tags=72%, list=15%, signal=84%
GIM	144	0.677912	1.61794	0.00798403	0.0196906	0.047	1492	tags=41%, list=8%, signal=44%
GRANULOCYTES	74	0.543897	1.61661	0.0141414	0.0158204	0.05	1981	tags=31%, list=11%, signal=35%
M1 MACROPHAGES	68	0.824286	1.58113	0	0.0208068	0.077	1451	tags=66%, list=8%, signal=72%
T CD4 NAIVE	53	0.530288	1.53967	0.0252101	0.0293888	0.116	1959	tags=28%, list=11%, signal=32%
NK CELL	64	0.351687	1.07695	0.334016	0.452487	0.726	2258	tags=28%, list=12%, signal=32%
NAIVE T CELL	27	0.3883	1.01997	0.449898	0.48177	0.776	2829	tags=37%, list=15%, signal=44%
B CELL	61	0.299298	0.99519	0.451292	0.456655	0.789	3770	tags=33%, list=20%, signal=41%
HSC	250	0.281028	0.877051	0.661943	0.566406	0.861	2749	tags=26%, list=15%, signal=30%
T CD4 ACTIVATED	9	-0.309627	-0.636833	0.890946	0.909142	0.95	2101	tags=22%, list=11%, signal=25%
T CD8 NAIVE	37	-0.302305	-0.899288	0.636364	0.71912	0.853	2107	tags=24%, list=11%, signal=27%
T CD8 ACTIVATED	50	-0.38343	-1.14986	0.271084	0.460322	0.634	2627	tags=28%, list=14%, signal=33%
NUC. ERYTHROCYTES	214	-0.395766	-1.30054	0.157588	0.454346	0.446	4168	tags=38%, list=22%, signal=49%
(B) Pediatric GBM (Paugh et al. 2010): HC3/Mesenchymal subtype (n=8) vs HC1/Proliferative and HC2/Proneural subtypes (n=29)
NAME	SIZE	ES	NES	NOM p-val	FDR q-val	FWER p-val	RANK AT MAX	LEADING EDGE
M2 MACROPHAGES	56	0.743581	1.67749	0.00205761	0.0165186	0.015	1839	tags=48%, list=9%, signal=53%
MONOCYTES	74	0.552755	1.49733	0.0260521	0.0872411	0.108	2130	tags=32%, list=10%, signal=36%
T CD8 NAIVE	37	0.434017	1.29842	0.11036	0.339837	0.436	560	tags=16%, list=3%, signal=17%
GRANULOCYTES	74	0.406465	1.2844	0.0898204	0.281081	0.466	3553	tags=31%, list=17%, signal=37%
GIM	140	0.466434	1.27322	0.128049	0.242974	0.485	3161	tags=38%, list=15%, signal=44%
M1 MACROPHAGES	62	0.580555	1.2517	0.203125	0.22698	0.522	3097	tags=44%, list=15%, signal=51%
HSC	249	0.35974	1.13137	0.228395	0.362087	0.733	2938	tags=28%, list=14%, signal=32%
T CD4 NAIVE	51	0.374914	1.11088	0.2875	0.349342	0.768	2080	tags=22%, list=10%, signal=24%
B CELL	60	0.270745	0.871817	0.658747	0.699846	0.947	1640	tags=13%, list=8%, signal=14%
T CD4 ACTIVATED	9	0.26546	0.637766	0.94877	0.962403	0.996	2402	tags=22%, list=12%, signal=25%
T CD8 ACTIVATED	49	-0.25009	-0.815841	0.763265	0.750588	0.984	2731	tags=16%, list=13%, signal=19%
NK CELL	58	-0.436001	-1.21344	0.177024	0.226442	0.626	893	tags=14%, list=4%, signal=14%
NAIVE T CELL	26	-0.505885	-1.22563	0.187747	0.315899	0.596	889	tags=19%, list=4%, signal=20%
NUC. ERYTHROCYTES	209	-0.521865	-1.74701	0	0.0019503	0.004	2516	tags=32%, list=12%, signal=36%
(C)Pediatric Astrocytoma (UCSF): HC3/Mesenchymal subtype (n=10) vs HC1/Proliferative and HC2/Proneural subtypes (n=14)
NAME	SIZE	ES	NES	NOM p-val	FDR q-val	FWER p-val	RANK AT MAX	LEADING EDGE
M2 MACROPHAGES	57	0.614677	1.5033	0.0363636	0.187002	0.108	1333	tags=35%, list=7%, signal=38%
NAIVE T CELL	26	0.429389	1.12513	0.267368	1	0.793	2198	tags=23%, list=11%, signal=26%
GRANULOCYTES	71	0.340425	1.11465	0.26742	0.955142	0.809	4299	tags=42%, list=22%, signal=54%
GIM	135	0.384159	1.08082	0.360248	0.816489	0.841	2425	tags=31%, list=13%, signal=35%
MONOCYTES	72	0.353271	1.06012	0.361004	0.70087	0.859	2023	tags=28%, list=11%, signal=31%
T CD8 NAIVE	35	0.320633	1.01967	0.402697	0.677452	0.9	4444	tags=37%, list=23%, signal=48%
T CD4 NAIVE	52	0.315643	0.974886	0.504065	0.676463	0.926	2936	tags=25%, list=15%, signal=29%
NK CELL	62	0.320605	0.921381	0.575049	0.708687	0.961	1221	tags=16%, list=6%, signal=17%
HSC	243	0.243191	0.849846	0.905882	0.778579	0.982	3793	tags=29%, list=20%, signal=36%
M1 MACROPHAGES	67	0.339171	0.735529	0.782961	0.884414	0.998	3106	tags=31%, list=16%, signal=37%
B CELL	59	-0.306746	-0.974527	0.520468	0.486883	0.945	3537	tags=34%, list=18%, signal=41%
T CD4 ACTIVATED	8	-0.579236	-1.10949	0.385659	0.38252	0.823	4412	tags=50%, list=23%, signal=65%
T CD8 ACTIVATED	49	-0.468422	-1.43016	0.0459559	0.0783608	0.223	3578	tags=35%, list=19%, signal=43%
NUC. ERYTHROCYTES	203	-0.46632	-1.55378	0.0198556	0.0445765	0.07	1812	tags=24%, list=9%, signal=26%
Abbreviations: ES: enrichment score; NES: normalized enrichment score; NOM p-val: nominal p-value; FDR q-val = false discovery rate q-value;
FWER p-val: Family-wise error rate p-value; GIM: glioma-infiltrating microglia/macrophage; HSC: hematopoietic stem cells
Note: the reduced size of some gene sets in the pediatric analysis (B)&(C) compared to adult (A) is due to some of the signature genes not being represented on the pediatric arrays
