# Supplementary material for: Increased Microglia/Macrophage Gene Expression in a Subset of Adult and Pediatric Astrocytomas
Source: PLoS One. 2012 Aug 22;7(8):e43339. doi: 10.1371/journal.pone.0043339 (PMC3425586; doi:10.1371/journal.pone.0043339)
Supplement: Table S5 — Gene Ontology (Biological Process) analysis of the TCGA Worst Prognosis Signature. (XLSX) [file pone.0043339.s011.xlsx]

## Sheet: Table S5
Table S5. Gene Ontology (Biological Process) analysis of the TCGA Worst Prognosis Signature [9].
Category	Term	Count	%	PValue	Genes	List Total	Pop Hits	Pop Total	Fold Enrichment	Bonferroni	Benjamini	FDR
GOTERM_BP_ALL	GO:0009611~response to wounding	58	6.91299	4.20026e-08	MASP2, PDGFA, CRP, CD97, CASP3, MYD88, CD44, HMOX1, CD46, IL1RAP, SERPINE1, MS4A2, LOX, CFI, IL1A, PDPN, CHST2, PLAUR, TNFAIP6, ADM, CCR4, F3, TFPI, CTSB, GAP43, TPST1, GGCX, NMI, CCL2, CXCL3, CCL8, MDK, TNFRSF1A, TMED7, HRH1, CCL20, FGA, HRH4, CNR2, SCARB1, PTX3, SCG2, SPP1, IL6, CEBPB, IL8, EFEMP2, IL1RN, ANXA1, ANXA5, SOD2, CCNB1, PLSCR1, TFRC, NUPR1, ITGA5, IRF7, C1RL	710	530	14116	2.17573	0.000126336	0.000126336	7.56554e-05
GOTERM_BP_ALL	GO:0009605~response to external stimulus	83	9.89273	1.652e-07	LDHA, GLRA1, IL6ST, PDGFA, MASP2, LEPR, CRP, CD97, CASP3, TNFRSF11B, MYD88, CD44, HMOX1, CD46, IL1RAP, SERPINE1, MS4A2, ANGPT1, CFI, LOX, IL1A, SP100, PDPN, CHST2, CLIC1, MMP14, DDIT3, PLAUR, TNFAIP6, ADM, CCR4, F3, TFPI, CTSB, GAP43, TPST1, GGCX, CCL2, NMI, CXCL5, ATG12, CXCL3, CCL8, HFE, ASNS, MDK, TMED7, TNFRSF1A, HRH1, CCL20, FGA, CNR2, HRH4, SCARB1, HSPA5, PTX3, SPP1, SCG2, GNAT1, GUCA1A, PL…	710	914	14116	1.80545	0.000496799	0.00024843	0.00029756
GOTERM_BP_ALL	GO:0006954~inflammatory response	39	4.64839	1.05243e-06	TPST1, NMI, CCL2, MASP2, CXCL3, CRP, CCL8, CD97, TNFRSF1A, TMED7, HRH1, MYD88, CD44, CCL20, HMOX1, CD46, IL1RAP, CNR2, HRH4, MS4A2, CFI, PTX3, IL1A, SCG2, SPP1, IL6, CEBPB, IL8, PDPN, IL1RN, CHST2, ANXA1, TNFAIP6, NUPR1, TFRC, CCR4, IRF7, F3, C1RL	710	325	14116	2.3858	0.00316069	0.00105468	0.00189562
GOTERM_BP_ALL	GO:0009987~cellular process	577	68.7723	1.32884e-05	DLC1, LDHA, RPL14, TUBB2A, OSMR, MPV17, RPLP2, WTAP, HOXD10, HOXD11, FAH, ISG20, CTNNB1, AGTR1, CUL5, DIRAS3, SERPINE1, ILK, LSM5, LSM4, FAS, ADAM8, PLS3, ACAA2, CGRRF1, PCBD1, PDPN, UGCG, PTPRR, PLAUR, NME5, GRB10, F3, RYR3, TRAPPC4, ARL8B, PMP22, IBSP, GGCX, PUS1, HSD17B12, HFE, RER1, ARF6, ARF5, PUS7, ZNF226, SYPL1, DUSP14, PIR, OBSL1, DIABLO, SPP1, GGH, ACACA, PCNP, DLAT, CD300A, MAP7, POP5, …	710	10541	14116	1.0883	0.0391834	0.00994317	0.0239324
GOTERM_BP_ALL	GO:0043066~negative regulation of apoptosis	38	4.5292	1.97741e-05	CCL2, MCL1, BNIP3, ASNS, TRIAP1, CASP3, MYD88, KRAS, FNTA, APOE, HMOX1, ILK, BCL3, TAF9, HSPA5, FAS, IL1A, SCG2, ANGPTL4, CFLAR, IL6, NOL3, CEBPB, BCL2A1, ANXA1, CSDA, ANXA5, HBXIP, ANXA4, SOD2, NME5, NRAS, HSP90B1, RNF7, F3, UBB, PRNP, IFI6	710	354	14116	2.13419	0.0577466	0.0118257	0.0356112
GOTERM_BP_ALL	GO:0010033~response to organic substance	63	7.50894	2.2009e-05	CGA, LDLR, OSMR, IL6ST, PDGFA, LEPR, AP3S1, AQP1, CTNNB1, CASP3, TNFRSF11B, FNTA, MYD88, CD44, APOE, HMOX1, ANGPT1, FAS, LOX, CASP1, SP100, LEF1, CLIC1, CNGA3, MMP14, DDIT3, CD83, GRB10, ADM, CCR4, HSPB7, HSPB2, PPP1R15A, PLA2G5, DERL2, CCL2, MCL1, OXTR, ASNS, GNG12, FKBP1B, TNFRSF1A, KRAS, SCARB1, TAF9, HSPE1, RNF14, SPP1, IL6, IL1RN, GGH, ACACA, ANXA5, GNAT3, LEP, DUSP4, EPS8, TFRC, SMPD1, FABP…	710	721	14116	1.73724	0.0640599	0.0109733	0.0396353
GOTERM_BP_ALL	GO:0043069~negative regulation of programmed cell death	38	4.5292	2.65789e-05	CCL2, MCL1, BNIP3, ASNS, TRIAP1, CASP3, MYD88, KRAS, FNTA, APOE, HMOX1, ILK, BCL3, TAF9, HSPA5, FAS, IL1A, SCG2, ANGPTL4, CFLAR, IL6, NOL3, CEBPB, BCL2A1, ANXA1, CSDA, ANXA5, HBXIP, ANXA4, SOD2, NME5, NRAS, HSP90B1, RNF7, F3, UBB, PRNP, IFI6	710	359	14116	2.10447	0.0768378	0.0113565	0.0478632
GOTERM_BP_ALL	GO:0060548~negative regulation of cell death	38	4.5292	2.82563e-05	CCL2, MCL1, BNIP3, ASNS, TRIAP1, CASP3, MYD88, KRAS, FNTA, APOE, HMOX1, ILK, BCL3, TAF9, HSPA5, FAS, IL1A, SCG2, ANGPTL4, CFLAR, IL6, NOL3, CEBPB, BCL2A1, ANXA1, CSDA, ANXA5, HBXIP, ANXA4, SOD2, NME5, NRAS, HSP90B1, RNF7, F3, UBB, PRNP, IFI6	710	360	14116	2.09862	0.0814842	0.0105683	0.0508832
GOTERM_BP_ALL	GO:0042221~response to chemical stimulus	97	11.5614	3.85332e-05	CGA, PDGFA, OSMR, IL6ST, AQP1, CTNNB1, FNTA, MYD88, CD44, PLOD2, APOE, SERPINE1, LOX, FAS, PDPN, CNGA3, DDIT3, PLAUR, GRB10, CCR4, HSPB7, HSPB2, DERL2, CCL2, MCL1, CCL8, KRAS, FGA, SLC30A5, HSPE1, SCARB1, TAF9, RNF14, SPP1, ANGPTL4, IL1RN, ACACA, GGH, GNAT3, EI24, CXCL14, EPS8, FABP3, PDCD6, LDLR, LEPR, BNIP3, AP3S1, TNFRSF11B, CASP3, HMOX1, GPX3, ANGPT1, SLC22A5, CASP1, NOL3, SP100, LEF1, CLIC1,…	710	1281	14116	1.50548	0.109445	0.0127963	0.0693836
GOTERM_BP_ALL	GO:0006916~anti-apoptosis	26	3.09893	3.93268e-05	CCL2, MCL1, BNIP3, TRIAP1, MYD88, APOE, HMOX1, FAS, HSPA5, IL1A, CFLAR, CEBPB, NOL3, BCL2A1, ANXA1, HBXIP, ANXA5, ANXA4, SOD2, NME5, HSP90B1, RNF7, F3, UBB, PRNP, IFI6	710	206	14116	2.50934	0.111568	0.01176	0.0708121
GOTERM_BP_ALL	GO:0010740~positive regulation of protein kinase cascade	22	2.62217	9.6115e-05	CFLAR, IL6, LITAF, GOLT1B, IL6ST, LEPR, LGALS1, NDFIP1, CTNNB1, UBE2N, LEP, LIF, TMED7, IKBKE, TNFRSF1A, TMEM9B, MYD88, HMOX1, F3, ILK, NENF, CASP1	710	167	14116	2.61914	0.251084	0.0259419	0.172982
GOTERM_BP_ALL	GO:0005996~monosaccharide metabolic process	26	3.09893	0.000133851	LDHA, IL6ST, HEXB, HK2, SLC35A2, SLC35A3, G6PC3, TPI1, UEVLD, HK3, GAPDH, PDK1, PDK3, CHST2, RBKS, DLAT, PCK2, PMM2, LEP, AMDHD2, ATF3, GBE1, SDS, PKM2, PGK1, MDH2	710	222	14116	2.32849	0.331455	0.0329977	0.24082
GOTERM_BP_ALL	GO:0048518~positive regulation of biological process	138	16.4482	0.000134289	PVR, DLC1, S100A6, ZAK, IL6ST, MASP2, PDGFA, OSMR, HOXD10, HOXD11, CTNNB1, CD47, AGTR1, CUL5, TMEM9B, MYD88, FNTA, TIAM2, CD44, APOE, CD46, ILK, ZNF443, MS4A2, CFI, FAS, IL1A, PCBD1, PDPN, GOLT1B, ARNTL, CSDA, DDIT3, STK3, HES1, PSMA1, CCR4, F3, PLA2G2A, CAMK1, LAMC1, DERL2, CCL2, LITAF, TNFRSF12A, HSD17B12, ARF6, STK17A, ABCA1, CALR, MDK, TIMP1, LIF, HOXA1, HOXA2, KRAS, ARPC2, PSMB3, PSMB2, DIAB…	710	2033	14116	1.34957	0.332334	0.0305965	0.241605
GOTERM_BP_ALL	GO:0031667~response to nutrient levels	24	2.86055	0.000143185	SP100, CCL2, ATG12, PDGFA, IL6ST, LEPR, HFE, ASNS, CLIC1, DDIT3, SOD2, LEP, TNFRSF11B, CD44, TFRC, ADM, HMOX1, ANGPT1, HSPA5, CP, IGFBP2, AACS, SPP1, VLDLR	710	197	14116	2.42213	0.349966	0.030298	0.257592
GOTERM_BP_ALL	GO:0042180~cellular ketone metabolic process	50	5.95948	0.00014473	ACOX2, LDHA, ECHDC2, PSPH, FAH, PEX7, AUH, P4HA2, ELOVL2, ELOVL6, ACAA2, CARS, DARS, PDPN, LYPLA1, SLC3A1, MTRR, SDS, PLA2G2A, SMS, CROT, PLA2G5, MDH2, BCAT1, ASS1, RBP1, ASNS, KMO, G6PC3, PIPOX, TNFRSF1A, MTHFS, CBR1, TPI1, LIAS, GSTO1, PTS, PDHX, GGH, ACACA, DALRD3, DLAT, PCK2, C9ORF3, LEP, ATF3, GLS, MCFD2, FABP3, AACS	710	567	14116	1.75324	0.352981	0.0286081	0.260368
GOTERM_BP_ALL	GO:0043086~negative regulation of catalytic activity	30	3.57569	0.000147462	CAST, NPY2R, LEPR, TRIB3, FKBP1B, POT1, SPRY2, CASP3, SPRY1, APOE, PSMB3, ILK, PSMB2, HSPA5, ANGPTL4, PSMD9, GNAT1, HBXIP, PSMB8, PSMA1, PSMD14, PSMC6, PSMD13, APITD1, RGS3, PSMC2, UBB, GADD45B, IFI6, DUSP6	710	277	14116	2.15325	0.358276	0.027344	0.265276
GOTERM_BP_ALL	GO:0042981~regulation of apoptosis	65	7.74732	0.000159011	DLC1, ZAK, BNIP3, TRIAP1, CASP3, CUL5, MYD88, FNTA, CASP4, CD44, TIAM2, APOE, HMOX1, ILK, ZNF443, FAS, CASP1, IL1A, NOL3, BCL2A1, CYCS, ACTN1, MBD4, CSDA, HBXIP, STK3, DDIT3, NME5, F3, CTSB, UBB, PRNP, CCL2, MCL1, ASNS, STK17A, CALR, KRAS, BCL3, PPP3CC, DIABLO, TAF9, HSPE1, HSPA5, SCG2, ANGPTL4, CFLAR, IL6, CEBPB, VAV3, TM2D1, LGALS1, ANXA1, ANXA5, ANXA4, SOD2, NRAS, HSP90B1, EI24, RNF7, NUPR1, I…	710	804	14116	1.60735	0.38019	0.0277456	0.286024
GOTERM_BP_ALL	GO:0044092~negative regulation of molecular function	34	4.05244	0.000161359	CAST, NPY2R, LEPR, TRIB3, FKBP1B, POT1, SPRY2, CASP3, SPRY1, APOE, HMOX1, PSMB3, ILK, PSMB2, HSPA5, ANGPTL4, PSMD9, GNAT1, SP100, NDFIP1, HBXIP, PSMB8, DDIT3, PSMA1, PSMD14, PSMC6, PSMD13, APITD1, RGS3, PSMC2, UBB, GADD45B, IFI6, DUSP6	710	334	14116	2.02388	0.384553	0.0266067	0.290242
GOTERM_BP_ALL	GO:0019752~carboxylic acid metabolic process	49	5.84029	0.000174452	ACOX2, LDHA, ECHDC2, PSPH, FAH, PEX7, AUH, P4HA2, ELOVL2, ELOVL6, ACAA2, CARS, DARS, PDPN, LYPLA1, SLC3A1, MTRR, SDS, PLA2G2A, SMS, CROT, PLA2G5, MDH2, BCAT1, ASS1, RBP1, KMO, ASNS, G6PC3, PIPOX, TNFRSF1A, MTHFS, TPI1, LIAS, GSTO1, PTS, PDHX, GGH, ACACA, DALRD3, DLAT, PCK2, C9ORF3, LEP, ATF3, GLS, MCFD2, FABP3, AACS	710	556	14116	1.75216	0.408325	0.027243	0.313759
GOTERM_BP_ALL	GO:0043436~oxoacid metabolic process	49	5.84029	0.000174452	ACOX2, LDHA, ECHDC2, PSPH, FAH, PEX7, AUH, P4HA2, ELOVL2, ELOVL6, ACAA2, CARS, DARS, PDPN, LYPLA1, SLC3A1, MTRR, SDS, PLA2G2A, SMS, CROT, PLA2G5, MDH2, BCAT1, ASS1, RBP1, KMO, ASNS, G6PC3, PIPOX, TNFRSF1A, MTHFS, TPI1, LIAS, GSTO1, PTS, PDHX, GGH, ACACA, DALRD3, DLAT, PCK2, C9ORF3, LEP, ATF3, GLS, MCFD2, FABP3, AACS	710	556	14116	1.75216	0.408325	0.027243	0.313759
GOTERM_BP_ALL	GO:0006950~response to stress	117	13.9452	0.000202531	ZAK, PDGFA, MASP2, APOBEC3F, CUL5, MYD88, CD44, PLOD2, APOE, CD46, SERPINE1, SLC2A1, ZNF443, MS4A2, EIF1, CFI, LOX, IL1A, HIGD1A, CGRRF1, PDPN, RINT1, CSDA, DDIT3, PLAUR, TNFAIP6, CCR4, F3, HSPB7, PLA2G2A, HSPB2, TFPI, CLEC5A, TPST1, GGCX, DERL2, CCL2, HUS1, HFE, CCL8, KMO, MDK, FGA, CNR2, HSPE1, SCARB1, IL1RAPL2, SPP1, ANGPTL4, MAFF, EFEMP2, IL1RN, ITGA5, CRP, BNIP3, CD97, TRIAP1, CASP3, HMOX1, …	710	1685	14116	1.38051	0.456256	0.0300045	0.364173
GOTERM_BP_ALL	GO:0006082~organic acid metabolic process	49	5.84029	0.000206869	ACOX2, LDHA, ECHDC2, PSPH, FAH, PEX7, AUH, P4HA2, ELOVL2, ELOVL6, ACAA2, CARS, DARS, PDPN, LYPLA1, SLC3A1, MTRR, SDS, PLA2G2A, SMS, CROT, PLA2G5, MDH2, BCAT1, ASS1, RBP1, KMO, ASNS, G6PC3, PIPOX, TNFRSF1A, MTHFS, TPI1, LIAS, GSTO1, PTS, PDHX, GGH, ACACA, DALRD3, DLAT, PCK2, C9ORF3, LEP, ATF3, GLS, MCFD2, FABP3, AACS	710	560	14116	1.73965	0.463306	0.0291998	0.371959
GOTERM_BP_ALL	GO:0043067~regulation of programmed cell death	65	7.74732	0.00021043	DLC1, ZAK, BNIP3, TRIAP1, CASP3, CUL5, MYD88, FNTA, CASP4, CD44, TIAM2, APOE, HMOX1, ILK, ZNF443, FAS, CASP1, IL1A, NOL3, BCL2A1, CYCS, ACTN1, MBD4, CSDA, HBXIP, STK3, DDIT3, NME5, F3, CTSB, UBB, PRNP, CCL2, MCL1, ASNS, STK17A, CALR, KRAS, BCL3, PPP3CC, DIABLO, TAF9, HSPE1, HSPA5, SCG2, ANGPTL4, CFLAR, IL6, CEBPB, VAV3, TM2D1, LGALS1, ANXA1, ANXA5, ANXA4, SOD2, NRAS, HSP90B1, EI24, RNF7, NUPR1, I…	710	812	14116	1.59151	0.469025	0.0283646	0.378351
GOTERM_BP_ALL	GO:0010941~regulation of cell death	65	7.74732	0.000240435	DLC1, ZAK, BNIP3, TRIAP1, CASP3, CUL5, MYD88, FNTA, CASP4, CD44, TIAM2, APOE, HMOX1, ILK, ZNF443, FAS, CASP1, IL1A, NOL3, BCL2A1, CYCS, ACTN1, MBD4, CSDA, HBXIP, STK3, DDIT3, NME5, F3, CTSB, UBB, PRNP, CCL2, MCL1, ASNS, STK17A, CALR, KRAS, BCL3, PPP3CC, DIABLO, TAF9, HSPE1, HSPA5, SCG2, ANGPTL4, CFLAR, IL6, CEBPB, VAV3, TM2D1, LGALS1, ANXA1, ANXA5, ANXA4, SOD2, NRAS, HSP90B1, EI24, RNF7, NUPR1, I…	710	815	14116	1.58566	0.514859	0.0309592	0.432189
GOTERM_BP_ALL	GO:0070482~response to oxygen levels	19	2.2646	0.000245729	CCL2, NOL3, PDPN, PDGFA, EGLN3, OXTR, BNIP3, MMP14, ITPR1, SOD2, HSP90B1, ADM, TFRC, PLOD2, HMOX1, ANGPT1, CASP1, ANGPTL4, VLDLR	710	141	14116	2.67909	0.522525	0.0303322	0.441684
GOTERM_BP_ALL	GO:0012501~programmed cell death	52	6.19785	0.000249617	DLC1, STEAP3, BNIP3, CTNNB1, TRIAP1, TNFRSF11B, CASP3, CASP4, TIAM2, CASP7, BAG2, FAS, CASP1, IL1A, EBAG9, NOL3, BCL2A1, CYCS, STK3, PKM2, F3, UBB, GADD45B, PPP1R15A, POLR2G, LITAF, MCL1, TNFRSF12A, EGLN3, TRIB3, ARF6, STK17A, PTRH2, TNFRSF1A, KRAS, BCAP29, PPP3CC, DIABLO, HSPE1, PHLDA2, CFLAR, IL6, PDCD10, VAV3, TM2D1, LGALS1, SOD2, NRAS, IFT57, APIP, PDCD6, IFI6	710	611	14116	1.69206	0.528078	0.029591	0.448659
GOTERM_BP_ALL	GO:0009991~response to extracellular stimulus	25	2.97974	0.000292842	LDHA, CCL2, ATG12, PDGFA, IL6ST, LEPR, HFE, ASNS, TNFRSF11B, CD44, HMOX1, ANGPT1, HSPA5, SPP1, SP100, CLIC1, DDIT3, SOD2, LEP, ADM, TFRC, CP, AACS, IGFBP2, VLDLR	710	220	14116	2.25928	0.585631	0.0333169	0.526158
GOTERM_BP_ALL	GO:0006915~apoptosis	51	6.07867	0.000322951	DLC1, STEAP3, BNIP3, CTNNB1, TRIAP1, TNFRSF11B, CASP3, CASP4, TIAM2, CASP7, BAG2, FAS, CASP1, IL1A, EBAG9, NOL3, BCL2A1, CYCS, STK3, F3, UBB, GADD45B, PPP1R15A, POLR2G, LITAF, MCL1, TNFRSF12A, EGLN3, TRIB3, ARF6, STK17A, PTRH2, TNFRSF1A, KRAS, BCAP29, PPP3CC, DIABLO, HSPE1, PHLDA2, CFLAR, IL6, PDCD10, VAV3, TM2D1, LGALS1, SOD2, NRAS, IFT57, APIP, PDCD6, IFI6	710	602	14116	1.68433	0.621521	0.0353452	0.580107
GOTERM_BP_ALL	GO:0015031~protein transport	61	7.27056	0.00034376	GRPEL1, SEC24A, AP2S1, UNC50, AP3S1, PEX3, PDIA4, PEX7, AP1S1, SRPR, HOMER3, COPB1, FXC1, MS4A2, NUP37, SAR1B, SEC24D, GOLT1B, SNUPN, RINT1, ARNTL, NUPL1, TIMM44, TIMM8B, IPO7, SNX10, SNX11, CHMP2A, DERL2, NUP98, NUP160, SNX2, AKAP12, TIMM10, ARF6, ARF5, ABCA1, SNX3, CALR, CHMP2B, UEVLD, PEX16, BCAP29, BCL3, EXOC3, TRAM1, PCSK5, TNPO1, SCG2, ABCB9, LIN7C, AP4S1, RAB33B, RAB32, COG5, HSP90B1, TOM1…	710	762	14116	1.59158	0.644492	0.0362622	0.617376
GOTERM_BP_ALL	GO:0032101~regulation of response to external stimulus	20	2.38379	0.000393782	IL6, IL8, PDPN, OSMR, PDGFA, IL6ST, NDFIP1, ANXA2P2, ANXA2, LEP, AGTR1, TNFRSF1A, APOE, CCR4, F3, SERPINE1, PLA2G2A, FABP7, SPP1, SCG2	710	159	14116	2.50084	0.694171	0.0400295	0.706912
GOTERM_BP_ALL	GO:0045184~establishment of protein localization	61	7.27056	0.00042708	GRPEL1, SEC24A, AP2S1, UNC50, AP3S1, PEX3, PDIA4, PEX7, AP1S1, SRPR, HOMER3, COPB1, FXC1, MS4A2, NUP37, SAR1B, SEC24D, GOLT1B, SNUPN, RINT1, ARNTL, NUPL1, TIMM44, TIMM8B, IPO7, SNX10, SNX11, CHMP2A, DERL2, NUP98, NUP160, SNX2, AKAP12, TIMM10, ARF6, ARF5, ABCA1, SNX3, CALR, CHMP2B, UEVLD, PEX16, BCAP29, BCL3, EXOC3, TRAM1, PCSK5, TNPO1, SCG2, ABCB9, LIN7C, AP4S1, RAB33B, RAB32, COG5, HSP90B1, TOM1…	710	769	14116	1.57709	0.723331	0.0419268	0.766472
GOTERM_BP_ALL	GO:0006096~glycolysis	10	1.1919	0.000472323	LDHA, TPI1, UEVLD, HK3, PKM2, HK2, DLAT, PGK1, GAPDH, MDH2	710	47	14116	4.23015	0.758548	0.0448066	0.847342
GOTERM_BP_ALL	GO:0006066~alcohol metabolic process	39	4.64839	0.000490045	LDHA, LDLR, CYP51A1, IL6ST, LEPR, HEXB, HK2, ABCA1, SLC35A2, SLC35A3, G6PC3, UEVLD, TPI1, APOE, HK3, SYNJ2, SCARB1, GAPDH, PDK1, ACAA2, PDK3, CHST2, RBKS, DLAT, PCK2, CHPT1, PMM2, LEP, AMDHD2, GBE1, ATF3, CYP27A1, SDS, PKM2, FABP3, PGK1, PLA2G5, MDH2, VLDLR	710	429	14116	1.80743	0.771088	0.0450302	0.879003
GOTERM_BP_ALL	GO:0048522~positive regulation of cellular process	124	14.7795	0.000511902	DLC1, S100A6, ZAK, IL6ST, PDGFA, OSMR, HOXD10, HOXD11, CTNNB1, CD47, AGTR1, CUL5, MYD88, FNTA, TMEM9B, TIAM2, CD44, APOE, ILK, ZNF443, MS4A2, FAS, IL1A, PCBD1, PDPN, GOLT1B, ARNTL, DDIT3, STK3, HES1, PSMA1, F3, PLA2G2A, CAMK1, LAMC1, DERL2, CCL2, LITAF, TNFRSF12A, HSD17B12, ARF6, STK17A, ABCA1, CALR, MDK, TIMP1, LIF, HOXA1, HOXA2, KRAS, ARPC2, PSMB3, PSMB2, DIABLO, SCARB1, TAF9, RNF14, SPP1, CFLA…	710	1847	14116	1.33478	0.785661	0.0456001	0.918037
GOTERM_BP_ALL	GO:0051704~multi-organism process	55	6.55542	0.000583359	PVR, CSH1, LDLR, LEPR, HEXB, BNIP3, APOBEC3F, ISG20, TRIM5, CUL5, MYD88, COPB1, CD46, SLC22A5, DLG1, SP100, EFNB2, IFI44, HBXIP, ADM, C1QBP, CCR4, IPO7, PLA2G2A, THOC7, NUP98, CCL2, HFE, CCL8, OXTR, IFI35, LIF, TNFRSF1A, NPAS3, CCL20, GRPR, BCL3, SCARB1, NEDD4L, PTX3, PCSK5, TNPO1, SPP1, MAFF, CFLAR, IL6, PLSCR1, TFRC, ITGA5, PSMC2, IRF7, PI3, TCEB1, IGFBP2, VLDLR	710	681	14116	1.60572	0.827137	0.0503152	1.04555
GOTERM_BP_ALL	GO:0006006~glucose metabolic process	19	2.2646	0.00066885	PDK1, LDHA, IL6ST, PDK3, HK2, DLAT, PCK2, G6PC3, LEP, TPI1, UEVLD, GBE1, ATF3, SDS, HK3, PKM2, PGK1, GAPDH, MDH2	710	153	14116	2.46897	0.866356	0.0558801	1.19791
GOTERM_BP_ALL	GO:0051443~positive regulation of ubiquitin-protein ligase activity	12	1.43027	0.000683704	UBE2N, CCNB1, PSMA1, PSMD14, PSMC6, PSMD13, PSMC2, PSMB3, PSMB2, UBB, PSMB8, PSMD9	710	70	14116	3.40829	0.8722	0.0555446	1.22436
GOTERM_BP_ALL	GO:0008219~cell death	57	6.7938	0.000701503	DLC1, STEAP3, ZAK, BNIP3, CTNNB1, TRIAP1, CASP3, TNFRSF11B, CASP4, TIAM2, CASP7, HMOX1, BAG2, FAS, CASP1, IL1A, EBAG9, NOL3, SLC33A1, BCL2A1, CYCS, STK3, PKM2, F3, UBB, GADD45B, PPP1R15A, CLN5, POLR2G, LITAF, MCL1, TNFRSF12A, EGLN3, TRIB3, ARF6, STK17A, PTRH2, TNFRSF1A, KRAS, BCAP29, PPP3CC, DIABLO, HSPE1, PHLDA2, CFLAR, IL6, PDCD10, VAV3, TM2D1, LGALS1, ITPR1, SOD2, NRAS, IFT57, APIP, PDCD6, IFI6	710	719	14116	1.57616	0.878867	0.0554535	1.25604
GOTERM_BP_ALL	GO:0016265~death	57	6.7938	0.000823856	DLC1, STEAP3, ZAK, BNIP3, CTNNB1, TRIAP1, CASP3, TNFRSF11B, CASP4, TIAM2, CASP7, HMOX1, BAG2, FAS, CASP1, IL1A, EBAG9, NOL3, SLC33A1, BCL2A1, CYCS, STK3, PKM2, F3, UBB, GADD45B, PPP1R15A, CLN5, POLR2G, LITAF, MCL1, TNFRSF12A, EGLN3, TRIB3, ARF6, STK17A, PTRH2, TNFRSF1A, KRAS, BCAP29, PPP3CC, DIABLO, HSPE1, PHLDA2, CFLAR, IL6, PDCD10, VAV3, TM2D1, LGALS1, ITPR1, SOD2, NRAS, IFT57, APIP, PDCD6, IFI6	710	724	14116	1.56527	0.916188	0.0631589	1.47358
GOTERM_BP_ALL	GO:0050818~regulation of coagulation	9	1.07271	0.000850968	PDPN, PDGFA, APOE, F3, SERPINE1, ANXA5, ANXA4, ANXA2P2, ANXA2	710	41	14116	4.36427	0.922757	0.0635523	1.52173
GOTERM_BP_ALL	GO:0006461~protein complex assembly	43	5.12515	0.000918272	POLR2H, POLR2G, NUP98, POLR2L, GLRA1, TUBB2A, TSPAN4, AP2S1, CAPZA2, HFE, ARPC4, CALR, POLR2C, CTNNB1, POLR2A, TNFRSF1A, TRIM5, FGA, IL1RAP, ILK, GPX3, SH3BGR, TAF9, ANGPT1, FAS, TNPO1, ANGPTL4, SNAPC5, DARS, PCBD1, MPP6, ANXA5, MIS12, SOD2, GTF2H1, TAF10, TBCA, IPO7, IRF7, CAPG, LAMC1, PRNP, PARVA	710	505	14116	1.6929	0.936925	0.0667534	1.64114
GOTERM_BP_ALL	GO:0070271~protein complex biogenesis	43	5.12515	0.000918272	POLR2H, POLR2G, NUP98, POLR2L, GLRA1, TUBB2A, TSPAN4, AP2S1, CAPZA2, HFE, ARPC4, CALR, POLR2C, CTNNB1, POLR2A, TNFRSF1A, TRIM5, FGA, IL1RAP, ILK, GPX3, SH3BGR, TAF9, ANGPT1, FAS, TNPO1, ANGPTL4, SNAPC5, DARS, PCBD1, MPP6, ANXA5, MIS12, SOD2, GTF2H1, TAF10, TBCA, IPO7, IRF7, CAPG, LAMC1, PRNP, PARVA	710	505	14116	1.6929	0.936925	0.0667534	1.64114
GOTERM_BP_ALL	GO:0031398~positive regulation of protein ubiquitination	13	1.54946	0.000954495	NDFIP1, PSMB8, CCNB1, UBE2N, PSMA1, PSMC6, PSMD14, PSMD13, PSMC2, PSMB3, PSMB2, UBB, PSMD9	710	84	14116	3.07693	0.943442	0.0676629	1.70536
GOTERM_BP_ALL	GO:0055066~di-, tri-valent inorganic cation homeostasis	25	2.97974	0.000967155	CCL2, IL6ST, HEXB, OXTR, HFE, CALR, BUD31, FKBP1B, AGTR1, CUL5, APOE, HMOX1, SLC30A5, RGN, FTL, NDFIP1, ITPR1, SOD2, HSP90B1, TFRC, ADM, CCR4, RYR3, CP, PRNP	710	239	14116	2.07967	0.945558	0.0669535	1.72779
GOTERM_BP_ALL	GO:0051351~positive regulation of ligase activity	12	1.43027	0.000981054	UBE2N, CCNB1, PSMA1, PSMD14, PSMC6, PSMD13, PSMC2, PSMB3, PSMB2, UBB, PSMB8, PSMD9	710	73	14116	3.26822	0.947789	0.0663576	1.75241
GOTERM_BP_ALL	GO:0006612~protein targeting to membrane	8	0.953516	0.0010638	SRPR, FXC1, PEX16, TIMM10, PEX3, TRAM1, TIMM8B, SSR3	710	33	14116	4.8198	0.959303	0.0701795	1.89888
GOTERM_BP_ALL	GO:0016052~carbohydrate catabolic process	15	1.78784	0.00109658	LDHA, HEXB, HK2, CHI3L1, CHI3L2, DLAT, GNS, UEVLD, TPI1, PKM2, HK3, PGK1, GAPDH, CTBS, MDH2	710	109	14116	2.73601	0.963129	0.0707158	1.95686
GOTERM_BP_ALL	GO:0044262~cellular carbohydrate metabolic process	35	4.17163	0.00109947	LDHA, LDLR, GALNT7, IL6ST, HEXB, HK2, ALG8, SLC35A2, SLC35A3, G6PC3, HS2ST1, TPI1, UEVLD, B3GALNT1, HK3, SYNJ2, GAPDH, SDF2, PDK1, PDK3, CHST2, RBKS, DLAT, PCK2, PMM2, LEP, AMDHD2, GBE1, ATF3, SDS, PKM2, ST8SIA5, PGK1, EXT2, MDH2	710	387	14116	1.79809	0.963448	0.0694089	1.96196
GOTERM_BP_ALL	GO:0001666~response to hypoxia	17	2.02622	0.00111266	CCL2, NOL3, PDGFA, EGLN3, BNIP3, MMP14, ITPR1, SOD2, HSP90B1, ADM, TFRC, PLOD2, HMOX1, ANGPT1, CASP1, ANGPTL4, VLDLR	710	134	14116	2.5223	0.964872	0.068771	1.98528
GOTERM_BP_ALL	GO:0031145~anaphase-promoting complex-dependent proteasomal ubiquitin-dependent protein catabolic process	11	1.31108	0.00140119	CCNB1, PSMA1, PSMD14, PSMC6, PSMD13, PSMC2, PSMB3, PSMB2, UBB, PSMB8, PSMD9	710	65	14116	3.36459	0.985268	0.0841196	2.49398
GOTERM_BP_ALL	GO:0050819~negative regulation of coagulation	7	0.834327	0.00152513	PDGFA, APOE, SERPINE1, ANXA5, ANXA4, ANXA2P2, ANXA2	710	26	14116	5.35276	0.989858	0.0894402	2.71172
GOTERM_BP_ALL	GO:0010035~response to inorganic substance	22	2.62217	0.00153297	PDGFA, GGH, LEF1, CNGA3, DDIT3, MT1X, SOD2, CTNNB1, TNFRSF11B, FNTA, FGA, TFRC, APOE, HMOX1, GPX3, SERPINE1, CYBRD1, SLC30A5, NEDD4L, PRNP, IGFBP2, PDCD6	710	205	14116	2.13364	0.990095	0.0881634	2.72549
GOTERM_BP_ALL	GO:0048545~response to steroid hormone stimulus	21	2.50298	0.00160578	IL6, CCL2, LDLR, PDGFA, LEPR, IL1RN, OXTR, AQP1, CNGA3, MMP14, CTNNB1, TNFRSF11B, KRAS, ADM, HMOX1, ANGPT1, FAS, LOX, IGFBP2, RNF14, SPP1	710	192	14116	2.17456	0.992046	0.0904319	2.85317
GOTERM_BP_ALL	GO:0019318~hexose metabolic process	21	2.50298	0.00160578	PDK1, LDHA, IL6ST, PDK3, HK2, DLAT, PCK2, SLC35A2, PMM2, G6PC3, LEP, TPI1, UEVLD, ATF3, GBE1, SDS, HK3, PKM2, PGK1, GAPDH, MDH2	710	192	14116	2.17456	0.992046	0.0904319	2.85317
GOTERM_BP_ALL	GO:0051438~regulation of ubiquitin-protein ligase activity	12	1.43027	0.0017093	UBE2N, CCNB1, PSMA1, PSMD14, PSMC6, PSMD13, PSMC2, PSMB3, PSMB2, UBB, PSMB8, PSMD9	710	78	14116	3.05872	0.994177	0.094222	3.03444
GOTERM_BP_ALL	GO:0043161~proteasomal ubiquitin-dependent protein catabolic process	14	1.66865	0.00175004	DERL2, PCNP, PSMB8, CCNB1, PSMA1, PSMC6, PSMD14, HSP90B1, PSMD13, PSMC2, PSMB3, PSMB2, UBB, PSMD9	710	102	14116	2.72886	0.99485	0.0946288	3.1057
GOTERM_BP_ALL	GO:0010498~proteasomal protein catabolic process	14	1.66865	0.00175004	DERL2, PCNP, PSMB8, CCNB1, PSMA1, PSMC6, PSMD14, HSP90B1, PSMD13, PSMC2, PSMB3, PSMB2, UBB, PSMD9	710	102	14116	2.72886	0.99485	0.0946288	3.1057
GOTERM_BP_ALL	GO:0065009~regulation of molecular function	70	8.34327	0.00196877	DLC1, CAST, C13ORF18, ZAK, LEPR, SDC4, BUD31, SPRY2, TBC1D15, AGTR1, SPRY1, CASP3, FNTA, MYD88, DIRAS3, APOE, HMOX1, ILK, RGN, MS4A2, PSMD9, SP100, PCBD1, CYCS, HBXIP, DDIT3, GTF2H1, UBE2N, PSMA1, APITD1, F3, UBB, CTSB, GADD45B, GAP43, NPY2R, TRIB3, FKBP1B, POT1, HRH1, KRAS, PSMB3, PSMB2, BCL3, DIABLO, HSPE1, SCARB1, MC3R, HSPA5, ANGPTL4, GNAT1, GUCA1A, IL6, VAV3, MET, NDFIP1, CDKN3, HOMER1, PSMB…	710	969	14116	1.43624	0.997336	0.103965	3.48739
GOTERM_BP_ALL	GO:0046474~glycerophospholipid biosynthetic process	11	1.31108	0.0019884	PIGL, PIGG, PIK3C2A, FABP3, PIGB, PTDSS1, CHPT1, PLA2G5, PLAUR, PIGN, PTDSS2	710	68	14116	3.21616	0.997489	0.10314	3.52158
GOTERM_BP_ALL	GO:0051437~positive regulation of ubiquitin-protein ligase activity during mitotic cell cycle	11	1.31108	0.0019884	CCNB1, PSMA1, PSMD14, PSMC6, PSMD13, PSMC2, PSMB3, PSMB2, UBB, PSMB8, PSMD9	710	68	14116	3.21616	0.997489	0.10314	3.52158
GOTERM_BP_ALL	GO:0045017~glycerolipid biosynthetic process	12	1.43027	0.00210299	PIGL, PIGG, PIK3C2A, FABP3, PIGB, PTDSS1, CHPT1, PLA2G5, PLAUR, PEX7, PIGN, PTDSS2	710	80	14116	2.98225	0.998222	0.10692	3.72091
GOTERM_BP_ALL	GO:0030003~cellular cation homeostasis	25	2.97974	0.00221171	CCL2, IL6ST, HEXB, OXTR, HFE, CALR, BUD31, FKBP1B, AGTR1, CUL5, APOE, SLC30A5, RGN, NEDD4L, FTL, NDFIP1, ITPR1, HSP90B1, TFRC, ADM, CCR4, RYR3, CP, PRNP, CLN5	710	254	14116	1.95686	0.998719	0.110277	3.90969
GOTERM_BP_ALL	GO:0006091~generation of precursor metabolites and energy	29	3.4565	0.0022422	LDHA, NDUFB5, IL6ST, LEPR, HK2, ATP5G1, UQCRQ, TPI1, UEVLD, HK3, ATP5L, COX17, GAPDH, GLRX, CYCS, ATP5F1, DLAT, ATP6V1D, SOD2, LEP, ATP6V1C1, GBE1, PKM2, TXN, SDHD, CYBRD1, PGK1, MDH2, CROT	710	313	14116	1.84207	0.998832	0.109895	3.96255
GOTERM_BP_ALL	GO:0006007~glucose catabolic process	10	1.1919	0.00225733	LDHA, TPI1, UEVLD, HK3, PKM2, HK2, DLAT, PGK1, GAPDH, MDH2	710	58	14116	3.42788	0.998884	0.108826	3.98879
GOTERM_BP_ALL	GO:0006886~intracellular protein transport	33	3.93325	0.0023019	GRPEL1, DERL2, NUP98, SEC24A, AP2S1, TIMM10, AKAP12, SNX2, AP3S1, PEX3, CALR, PEX7, AP1S1, SRPR, HOMER3, FXC1, COPB1, PEX16, BCAP29, BCL3, SAR1B, TNPO1, TRAM1, SEC24D, SNUPN, ARNTL, AP4S1, TIMM44, TIMM8B, TOM1L1, IPO7, SSR3, TOB1	710	374	14116	1.75427	0.999024	0.10911	4.066
GOTERM_BP_ALL	GO:0051340~regulation of ligase activity	12	1.43027	0.00232577	UBE2N, CCNB1, PSMA1, PSMD14, PSMC6, PSMD13, PSMC2, PSMB3, PSMB2, UBB, PSMB8, PSMD9	710	81	14116	2.94544	0.999092	0.108474	4.10734
GOTERM_BP_ALL	GO:0005975~carbohydrate metabolic process	43	5.12515	0.0023551	LDHA, LDLR, GALNT7, IL6ST, HEXB, HK2, ALG8, SLC35A2, SLC35A3, G6PC3, HS2ST1, GLB1, UEVLD, TPI1, SLC2A3, B3GALNT1, HK3, SYNJ2, CTBS, GAPDH, SDF2, PDK1, PDK3, CHST2, CHI3L1, CHI3L2, RBKS, DLAT, SLC3A1, PCK2, PMM2, LEP, GNS, AMDHD2, GBE1, ATF3, MPI, SDS, PKM2, ST8SIA5, PGK1, EXT2, MDH2	710	530	14116	1.61304	0.999169	0.108094	4.1581
GOTERM_BP_ALL	GO:0030005~cellular di-, tri-valent inorganic cation homeostasis	23	2.74136	0.00242842	CCL2, IL6ST, HEXB, NDFIP1, OXTR, HFE, CALR, FKBP1B, BUD31, ITPR1, AGTR1, HSP90B1, CUL5, TFRC, ADM, CCR4, APOE, RYR3, SLC30A5, RGN, CP, PRNP, FTL	710	227	14116	2.01444	0.999334	0.109604	4.2849
GOTERM_BP_ALL	GO:0019221~cytokine-mediated signaling pathway	11	1.31108	0.00247978	LEP, PLP2, TNFRSF1A, IL6, SP100, CCL2, KRAS, IL6ST, LEPR, RQCD1, IL1A	710	70	14116	3.12427	0.999429	0.110143	4.37361
GOTERM_BP_ALL	GO:0055080~cation homeostasis	27	3.21812	0.00254523	CCL2, IL6ST, HEXB, OXTR, HFE, CALR, BUD31, FKBP1B, AGTR1, CUL5, APOE, HMOX1, SLC30A5, RGN, NEDD4L, FTL, NDFIP1, ITPR1, SOD2, HSP90B1, TFRC, ADM, CCR4, RYR3, CP, PRNP, CLN5	710	286	14116	1.87694	0.999531	0.111247	4.48658
GOTERM_BP_ALL	GO:0032787~monocarboxylic acid metabolic process	28	3.33731	0.00257611	ACOX2, LDHA, RBP1, ECHDC2, PIPOX, G6PC3, PEX7, MTHFS, TNFRSF1A, TPI1, P4HA2, ELOVL2, ELOVL6, PDHX, ACAA2, PDPN, ACACA, LYPLA1, DLAT, PCK2, C9ORF3, LEP, ATF3, SDS, FABP3, AACS, PLA2G5, CROT	710	301	14116	1.84946	0.999573	0.110913	4.53982
GOTERM_BP_ALL	GO:0050790~regulation of catalytic activity	62	7.38975	0.00267607	DLC1, CAST, C13ORF18, ZAK, LEPR, SDC4, BUD31, SPRY2, TBC1D15, AGTR1, SPRY1, CASP3, FNTA, DIRAS3, APOE, ILK, RGN, MS4A2, PSMD9, CYCS, HBXIP, GTF2H1, UBE2N, PSMA1, APITD1, F3, CTSB, UBB, GADD45B, GAP43, NPY2R, TRIB3, FKBP1B, POT1, HRH1, KRAS, PSMB3, PSMB2, DIABLO, SCARB1, HSPE1, MC3R, HSPA5, ANGPTL4, GNAT1, GUCA1A, VAV3, MET, CDKN3, HOMER1, PSMB8, SOD2, CCNB1, PSMC6, PSMD14, PSMD13, RGS3, PSMC2, IF…	710	846	14116	1.45705	0.999684	0.11335	4.71198
GOTERM_BP_ALL	GO:0006952~defense response	48	5.7211	0.002714	TPST1, NMI, CCL2, MASP2, CXCL3, CRP, CCL8, BNIP3, APOBEC3F, CD97, TNFRSF1A, TMED7, HRH1, MYD88, CD44, CCL20, HMOX1, CD46, IL1RAP, HRH4, CNR2, MS4A2, BCL3, CFI, PTX3, IL1RAPL2, IL1A, SCG2, SPP1, IL6, CEBPB, SP100, IL8, PDPN, IL1RN, ANXA1, CHST2, CLIC1, TNFAIP6, CD83, NUPR1, TFRC, CCR4, IRF7, F3, C1RL, PLA2G2A, CLEC5A	710	615	14116	1.55174	0.999718	0.113273	4.77724
GOTERM_BP_ALL	GO:0051439~regulation of ubiquitin-protein ligase activity during mitotic cell cycle	11	1.31108	0.00275956	CCNB1, PSMA1, PSMD14, PSMC6, PSMD13, PSMC2, PSMB3, PSMB2, UBB, PSMB8, PSMD9	710	71	14116	3.08026	0.999755	0.113494	4.85557
GOTERM_BP_ALL	GO:0006810~transport	162	19.3087	0.00288758	CGA, GRPEL1, GABRB2, UNC50, AQP1, SLC35A2, SLC35A3, CTNNB1, ATP2B1, SLC25A20, APOE, SLC25A24, HOMER3, SLC2A3, SLC2A1, DNAJC6, MS4A2, NUP37, SAR1B, SLC4A3, FTL, CHRNA2, SLC33A1, GOLT1B, PDPN, RINT1, ARNTL, CNGA3, NUPL1, TIMM8B, SLC25A32, TRIM36, LRP12, RYR3, VAMP5, TRAPPC4, VAMP4, CAMK1, CROT, CHMP2A, DERL2, SLC2A10, FXYD3, CNIH, RBP1, SLC38A6, SNX2, AKAP12, CCL8, HFE, RER1, ARF6, ARF5, ABCA1, SNX…	710	2629	14116	1.22512	0.999833	0.116852	5.07533
GOTERM_BP_ALL	GO:0048519~negative regulation of biological process	117	13.9452	0.00302872	DLC1, CGA, IL6ST, PDGFA, CAPZA2, APOBEC3F, CTNNB1, AZGP1, CUL5, FNTA, MYD88, APOE, ILK, SERPINE1, TGFBI, RRAS, FAS, IL1A, ZNF593, CGRRF1, BCL2A1, ACTN1, CSDA, HBXIP, HES1, NME5, PSMA1, GRB10, F3, PLA2G2A, PMP22, EMP3, GRB14, CCL2, MCL1, HUS1, ARF6, IGF2BP3, ABCA1, CALR, TIMP1, LIF, HOXA2, KRAS, PSMB3, PSMB2, TAF9, SPP1, ANGPTL4, CFLAR, NDFIP1, TAX1BP3, PSMB8, EI24, PSMC6, RNF7, RGS3, PSMC2, MLX, …	710	1812	14116	1.28375	0.999891	0.120595	5.31705
GOTERM_BP_ALL	GO:0051649~establishment of localization in cell	62	7.38975	0.00308626	CGA, GRPEL1, SEC24A, GLRA1, AP2S1, BNIP3, AP3S1, PEX3, PDIA4, PEX7, SLC25A20, AP1S1, APOE, SRPR, HOMER3, COPB1, FXC1, DNAJC6, MS4A2, SAR1B, SEC24D, FTL, ARL1, SNUPN, ARNTL, TIMM44, TIMM8B, TRIM36, IPO7, CAMK1, THOC7, TRAPPC4, DERL2, NUP98, NUP160, SNX2, AKAP12, TIMM10, RER1, CCL8, ABCA1, CALR, FKBP1B, PEX16, BCAP29, BCL3, EXOC3, TRAM1, PCSK5, TNPO1, SCG2, XPOT, IL6, LIN7C, AP4S1, LEP, COG5, TOM1L…	710	852	14116	1.44679	0.999908	0.121146	5.41544
GOTERM_BP_ALL	GO:0043123~positive regulation of I-kappaB kinase/NF-kappaB cascade	13	1.54946	0.00333016	CFLAR, LITAF, GOLT1B, LGALS1, NDFIP1, UBE2N, IKBKE, TNFRSF1A, TMED7, TMEM9B, MYD88, HMOX1, CASP1	710	97	14116	2.66456	0.999956	0.128422	5.83138
GOTERM_BP_ALL	GO:0046907~intracellular transport	50	5.95948	0.00359056	GRPEL1, SEC24A, AP2S1, AP3S1, BNIP3, PEX3, PEX7, SLC25A20, AP1S1, SRPR, APOE, HOMER3, COPB1, FXC1, DNAJC6, SAR1B, SEC24D, FTL, ARL1, SNUPN, ARNTL, TIMM44, TIMM8B, IPO7, THOC7, TRAPPC4, CAMK1, NUP98, DERL2, NUP160, SNX2, AKAP12, TIMM10, RER1, ABCA1, CALR, FKBP1B, PEX16, BCAP29, BCL3, TRAM1, TNPO1, XPOT, AP4S1, COG5, TOM1L1, MLX, YKT6, TOB1, SSR3	710	657	14116	1.51307	0.99998	0.136027	6.27356
GOTERM_BP_ALL	GO:0016192~vesicle-mediated transport	45	5.36353	0.00367433	SEC24A, LDLR, CNIH, GLRA1, AP2S1, CRP, SNX2, HFE, RER1, CCL8, AP3S1, ARF6, ARF5, SNX3, ABCA1, CTNNB1, AP1S1, KRAS, APOE, COPB1, BCAP29, EXOC3, DNAJC6, SCARB1, PTX3, SAR1B, SEC24D, FTL, ARL1, VAV3, GOLT1B, RINT1, LIN7C, AP4S1, NRAS, COG5, TRIM36, TFRC, LRP12, MCFD2, VAMP5, TRAPPC4, VAMP4, YKT6, VLDLR	710	576	14116	1.55326	0.999984	0.137255	6.41538
GOTERM_BP_ALL	GO:0045765~regulation of angiogenesis	10	1.1919	0.0040166	TNFRSF1A, IL6, LECT1, HMOX1, F3, SERPINE1, RNH1, ANGPT2, IL1A, ANGPTL4	710	63	14116	3.15582	0.999994	0.147253	6.99277
GOTERM_BP_ALL	GO:0031396~regulation of protein ubiquitination	13	1.54946	0.00428216	NDFIP1, PSMB8, CCNB1, UBE2N, PSMA1, PSMC6, PSMD14, PSMD13, PSMC2, PSMB3, PSMB2, UBB, PSMD9	710	100	14116	2.58462	0.999998	0.154343	7.43844
GOTERM_BP_ALL	GO:0051234~establishment of localization	162	19.3087	0.00437274	CGA, GRPEL1, GABRB2, UNC50, AQP1, SLC35A2, SLC35A3, CTNNB1, ATP2B1, SLC25A20, APOE, SLC25A24, HOMER3, SLC2A3, SLC2A1, DNAJC6, MS4A2, NUP37, SAR1B, SLC4A3, FTL, CHRNA2, SLC33A1, GOLT1B, PDPN, RINT1, ARNTL, CNGA3, NUPL1, TIMM8B, SLC25A32, TRIM36, LRP12, RYR3, VAMP5, TRAPPC4, VAMP4, CAMK1, CROT, CHMP2A, DERL2, SLC2A10, FXYD3, CNIH, RBP1, SLC38A6, SNX2, AKAP12, CCL8, HFE, RER1, ARF6, ARF5, ABCA1, SNX…	710	2656	14116	1.21266	0.999998	0.155492	7.58999
GOTERM_BP_ALL	GO:0032103~positive regulation of response to external stimulus	10	1.1919	0.00447091	AGTR1, TNFRSF1A, IL6, IL8, OSMR, CCR4, IL6ST, F3, PLA2G2A, SCG2	710	64	14116	3.10651	0.999999	0.156855	7.75397
GOTERM_BP_ALL	GO:0044419~interspecies interaction between organisms	26	3.09893	0.00449493	PVR, NUP98, LDLR, BNIP3, APOBEC3F, TRIM5, TNFRSF1A, CUL5, COPB1, CD46, SCARB1, NEDD4L, SLC22A5, TNPO1, DLG1, CFLAR, SP100, EFNB2, TFRC, C1QBP, ITGA5, IPO7, PSMC2, IRF7, THOC7, TCEB1	710	283	14116	1.82659	0.999999	0.155821	7.79405
GOTERM_BP_ALL	GO:0007584~response to nutrient	16	1.90703	0.00451214	SP100, CCL2, PDGFA, IL6ST, CLIC1, DDIT3, TNFRSF11B, TFRC, CD44, HMOX1, ANGPT1, CP, AACS, IGFBP2, SPP1, VLDLR	710	140	14116	2.27219	0.999999	0.154597	7.82276
GOTERM_BP_ALL	GO:0006090~pyruvate metabolic process	8	0.953516	0.00454221	LDHA, TPI1, ATF3, SDS, DLAT, PCK2, PDHX, G6PC3	710	42	14116	3.78699	0.999999	0.153801	7.87289
GOTERM_BP_ALL	GO:0033036~macromolecule localization	74	8.82002	0.00490629	GRPEL1, SEC24A, LDLR, AP2S1, UNC50, HEXB, AP3S1, PEX3, PDIA4, PEX7, CTNNB1, SLC25A20, AP1S1, APOE, SRPR, HOMER3, FXC1, COPB1, MS4A2, NUP37, SAR1B, SEC24D, GOLT1B, SNUPN, RINT1, ARNTL, NUPL1, TIMM44, TIMM8B, IPO7, THOC7, PLA2G5, CROT, SNX10, SNX11, CHMP2A, DERL2, NUP98, NUP160, TIMM10, AKAP12, SNX2, ARF6, ARF5, ABCA1, SNX3, CALR, CHMP2B, UEVLD, PEX16, BCAP29, BCL3, EXOC3, SCARB1, TRAM1, PCSK5, TNP…	710	1076	14116	1.36733	1	0.163264	8.47793
GOTERM_BP_ALL	GO:0051436~negative regulation of ubiquitin-protein ligase activity during mitotic cell cycle	10	1.1919	0.00496426	PSMA1, PSMD14, PSMC6, PSMD13, PSMC2, PSMB3, PSMB2, UBB, PSMB8, PSMD9	710	65	14116	3.05872	1	0.163234	8.57391
GOTERM_BP_ALL	GO:0042127~regulation of cell proliferation	57	6.7938	0.0051477	DLC1, S100A6, OSMR, IL6ST, PDGFA, CTNNB1, AZGP1, AGTR1, CD47, CASP3, CUL5, MYD88, FNTA, APOE, HMOX1, ILK, SERPINE1, CDK10, IL1A, CGRRF1, CD164, MMP12, HOXC10, HES1, ADM, F3, PLA2G2A, LAMC1, EMP3, PMP22, DERL2, CCL2, CXCL5, EGLN3, CALR, TIMP1, LIF, KRAS, GRPR, GPNMB, SCG2, IL6, IL8, NDFIP1, ANXA1, TAX1BP3, CDKN3, SOD2, NRAS, C19ORF10, ATF3, NUPR1, FABP3, FABP7, MAB21L2, TOB1, IGFBP5	710	787	14116	1.43997	1	0.166931	8.87703
GOTERM_BP_ALL	GO:0034613~cellular protein localization	34	4.05244	0.00532279	NUP98, GRPEL1, DERL2, SEC24A, AP2S1, TIMM10, AKAP12, SNX2, AP3S1, PEX3, CALR, CTNNB1, PEX7, AP1S1, SRPR, HOMER3, FXC1, COPB1, PEX16, BCAP29, BCL3, SAR1B, TNPO1, TRAM1, SEC24D, SNUPN, ARNTL, AP4S1, TIMM44, TIMM8B, TOM1L1, IPO7, SSR3, TOB1	710	411	14116	1.64471	1	0.170283	9.16546
GOTERM_BP_ALL	GO:0001935~endothelial cell proliferation	4	0.476758	0.00584306	HMOX1, SCARB1, MMP14, DLG1	710	8	14116	9.94085	1	0.183407	10.0174
GOTERM_BP_ALL	GO:0006605~protein targeting	21	2.50298	0.0059036	GRPEL1, NUP98, SNUPN, AKAP12, TIMM10, PEX3, ARNTL, CALR, TIMM44, TIMM8B, PEX7, SRPR, IPO7, HOMER3, FXC1, PEX16, BCL3, TNPO1, TRAM1, SSR3, TOB1	710	215	14116	1.94193	1	0.183227	10.1161
GOTERM_BP_ALL	GO:0070727~cellular macromolecule localization	34	4.05244	0.00592627	NUP98, GRPEL1, DERL2, SEC24A, AP2S1, TIMM10, AKAP12, SNX2, AP3S1, PEX3, CALR, CTNNB1, PEX7, AP1S1, SRPR, HOMER3, FXC1, COPB1, PEX16, BCAP29, BCL3, SAR1B, TNPO1, TRAM1, SEC24D, SNUPN, ARNTL, AP4S1, TIMM44, TIMM8B, TOM1L1, IPO7, SSR3, TOB1	710	414	14116	1.6328	1	0.181998	10.153
GOTERM_BP_ALL	GO:0034097~response to cytokine stimulus	11	1.31108	0.00601735	CASP3, FNTA, SP100, MYD88, MCL1, OSMR, IL6ST, OXTR, TAF9, PLA2G5, CTNNB1	710	79	14116	2.76834	1	0.182677	10.3012
GOTERM_BP_ALL	GO:0006959~humoral immune response	11	1.31108	0.00601735	CD83, IL6, CCL2, BST1, MASP2, CD46, CRP, C1RL, BCL3, MS4A2, CFI	710	79	14116	2.76834	1	0.182677	10.3012
GOTERM_BP_ALL	GO:0051352~negative regulation of ligase activity	10	1.1919	0.00607681	PSMA1, PSMD14, PSMC6, PSMD13, PSMC2, PSMB3, PSMB2, UBB, PSMB8, PSMD9	710	67	14116	2.96742	1	0.182481	10.3978
GOTERM_BP_ALL	GO:0051444~negative regulation of ubiquitin-protein ligase activity	10	1.1919	0.00607681	PSMA1, PSMD14, PSMC6, PSMD13, PSMC2, PSMB3, PSMB2, UBB, PSMB8, PSMD9	710	67	14116	2.96742	1	0.182481	10.3978
GOTERM_BP_ALL	GO:0017038~protein import	15	1.78784	0.0060968	GRPEL1, NUP98, SNUPN, TIMM10, PEX3, ARNTL, TIMM44, TIMM8B, PEX7, IPO7, FXC1, PEX16, BCL3, TNPO1, TOB1	710	131	14116	2.27653	1	0.181227	10.4302
GOTERM_BP_ALL	GO:0006650~glycerophospholipid metabolic process	14	1.66865	0.00626881	PIK3C2A, CHPT1, SACM1L, PIGN, PLAUR, PIGL, PIGG, PIGB, FABP3, PLA2G2A, SYNJ2, PTDSS1, PLA2G5, PTDSS2	710	118	14116	2.35884	1	0.184046	10.709
GOTERM_BP_ALL	GO:0008104~protein localization	62	7.38975	0.00652672	GRPEL1, SEC24A, AP2S1, UNC50, AP3S1, PEX3, PDIA4, PEX7, CTNNB1, AP1S1, SRPR, HOMER3, COPB1, FXC1, MS4A2, NUP37, SAR1B, SEC24D, GOLT1B, SNUPN, RINT1, ARNTL, NUPL1, TIMM44, TIMM8B, IPO7, SNX10, SNX11, CHMP2A, DERL2, NUP98, NUP160, SNX2, AKAP12, TIMM10, ARF6, ARF5, ABCA1, SNX3, CALR, CHMP2B, UEVLD, PEX16, BCAP29, BCL3, EXOC3, TRAM1, PCSK5, TNPO1, SCG2, ABCB9, LIN7C, AP4S1, RAB33B, RAB32, COG5, HSP90…	710	882	14116	1.39758	1	0.189042	11.1255
GOTERM_BP_ALL	GO:0019724~B cell mediated immunity	9	1.07271	0.00653454	MYD88, MASP2, SWAP70, CD46, CRP, C1RL, BCL3, FAS, CFI	710	56	14116	3.19527	1	0.187454	11.1381
GOTERM_BP_ALL	GO:0048583~regulation of response to stimulus	37	4.41001	0.00661874	PVR, ZAK, OSMR, IL6ST, MASP2, PDGFA, AP2S1, CRP, APOBEC3F, AGTR1, TNFRSF1A, MYD88, APOE, HMOX1, CD46, SERPINE1, MS4A2, TAF9, CFI, SCG2, SPP1, IL6, IL8, PDPN, NDFIP1, ANXA2P2, ANXA2, UBE2N, LEP, GRB10, CCR4, IRF7, F3, PLA2G2A, C1RL, FABP7, GRB14	710	465	14116	1.58198	1	0.187855	11.2737
GOTERM_BP_ALL	GO:0048523~negative regulation of cellular process	106	12.6341	0.00684129	DLC1, IL6ST, PDGFA, CAPZA2, CTNNB1, AZGP1, CUL5, FNTA, MYD88, APOE, ILK, TGFBI, RRAS, FAS, IL1A, ZNF593, CGRRF1, BCL2A1, ACTN1, CSDA, HBXIP, HES1, NME5, PSMA1, GRB10, F3, PLA2G2A, PMP22, EMP3, GRB14, CCL2, MCL1, HUS1, ARF6, IGF2BP3, ABCA1, CALR, TIMP1, LIF, HOXA2, KRAS, PSMB3, PSMB2, TAF9, SPP1, ANGPTL4, CFLAR, NDFIP1, TAX1BP3, PSMB8, EI24, PSMC6, RNF7, RGS3, MLX, PSMC2, FABP3, FABP7, IFI6, COPS2…	710	1660	14116	1.26955	1	0.191747	11.631
GOTERM_BP_ALL	GO:0019725~cellular homeostasis	37	4.41001	0.00694238	CCL2, MCL1, GLRA1, IL6ST, HEXB, PRDX4, HFE, OXTR, BNIP3, PDIA4, CALR, FKBP1B, BUD31, AGTR1, CUL5, APOE, ILK, RGN, SLC30A5, NEDD4L, GLRX, FTL, NDFIP1, DDIT3, ITPR1, SOD2, HSP90B1, TFRC, ADM, CCR4, RYR3, TXN, CP, PRNP, PMP22, IFI6, CLN5	710	466	14116	1.57859	1	0.192516	11.7929
GOTERM_BP_ALL	GO:0034381~lipoprotein particle clearance	5	0.595948	0.00707645	LDLR, APOE, HMOX1, SCARB1, VLDLR	710	16	14116	6.21303	1	0.194083	12.0072
GOTERM_BP_ALL	GO:0010627~regulation of protein kinase cascade	23	2.74136	0.00728195	CFLAR, IL6, ZAK, LITAF, GOLT1B, IL6ST, LEPR, LGALS1, NDFIP1, CTNNB1, UBE2N, LEP, LIF, TMED7, IKBKE, TNFRSF1A, TMEM9B, MYD88, HMOX1, F3, ILK, NENF, CASP1	710	249	14116	1.83646	1	0.197355	12.3346
GOTERM_BP_ALL	GO:0043122~regulation of I-kappaB kinase/NF-kappaB cascade	13	1.54946	0.00735885	CFLAR, LITAF, GOLT1B, LGALS1, NDFIP1, UBE2N, IKBKE, TNFRSF1A, TMED7, TMEM9B, MYD88, HMOX1, CASP1	710	107	14116	2.41553	1	0.197459	12.4568
GOTERM_BP_ALL	GO:0019320~hexose catabolic process	10	1.1919	0.00737206	LDHA, TPI1, UEVLD, HK3, PKM2, HK2, DLAT, PGK1, GAPDH, MDH2	710	69	14116	2.8814	1	0.196042	12.4778
GOTERM_BP_ALL	GO:0046486~glycerolipid metabolic process	17	2.02622	0.00750265	PIK3C2A, IL6ST, CHPT1, PLAUR, PIGN, PEX7, SACM1L, PIGL, PIGG, APOE, PLA2G2A, PIGB, FABP3, SYNJ2, PTDSS1, PLA2G5, PTDSS2	710	162	14116	2.08635	1	0.197427	12.685
GOTERM_BP_ALL	GO:0006873~cellular ion homeostasis	31	3.69487	0.00773559	CCL2, GLRA1, IL6ST, HEXB, OXTR, BNIP3, HFE, CALR, BUD31, FKBP1B, AGTR1, CUL5, APOE, ILK, RGN, SLC30A5, NEDD4L, FTL, NDFIP1, ITPR1, SOD2, HSP90B1, TFRC, ADM, CCR4, RYR3, CP, PRNP, PMP22, IFI6, CLN5	710	374	14116	1.64795	1	0.20117	13.0534
GOTERM_BP_ALL	GO:0030193~regulation of blood coagulation	7	0.834327	0.00842823	PDPN, PDGFA, APOE, F3, SERPINE1, ANXA2P2, ANXA2	710	36	14116	3.86588	1	0.215314	14.1401
GOTERM_BP_ALL	GO:0055072~iron ion homeostasis	7	0.834327	0.00842823	TFRC, HMOX1, NDFIP1, HFE, CP, SOD2, FTL	710	36	14116	3.86588	1	0.215314	14.1401
GOTERM_BP_ALL	GO:0051641~cellular localization	64	7.62813	0.00854394	CGA, GRPEL1, SEC24A, GLRA1, AP2S1, BNIP3, AP3S1, PEX3, PDIA4, PEX7, CTNNB1, SLC25A20, AP1S1, APOE, SRPR, HOMER3, COPB1, FXC1, SYNJ2, DNAJC6, MS4A2, SAR1B, SEC24D, FTL, ARL1, SNUPN, ARNTL, TIMM44, TIMM8B, TRIM36, IPO7, CAMK1, THOC7, TRAPPC4, DERL2, NUP98, NUP160, AKAP12, SNX2, TIMM10, RER1, CCL8, ABCA1, CALR, FKBP1B, PEX16, BCAP29, BCL3, EXOC3, TRAM1, PCSK5, TNPO1, SCG2, XPOT, IL6, LIN7C, AP4S1, L…	710	928	14116	1.37115	1	0.216118	14.3204
GOTERM_BP_ALL	GO:0046365~monosaccharide catabolic process	10	1.1919	0.0088682	LDHA, TPI1, UEVLD, HK3, PKM2, HK2, DLAT, PGK1, GAPDH, MDH2	710	71	14116	2.80024	1	0.221523	14.8237
GOTERM_BP_ALL	GO:0006368~RNA elongation from RNA polymerase II promoter	8	0.953516	0.00956686	POLR2H, TAF10, POLR2G, POLR2L, TAF9, POLR2C, GTF2H1, POLR2A	710	48	14116	3.31362	1	0.234891	15.8987
GOTERM_BP_ALL	GO:0055082~cellular chemical homeostasis	31	3.69487	0.0096663	CCL2, GLRA1, IL6ST, HEXB, OXTR, BNIP3, HFE, CALR, BUD31, FKBP1B, AGTR1, CUL5, APOE, ILK, RGN, SLC30A5, NEDD4L, FTL, NDFIP1, ITPR1, SOD2, HSP90B1, TFRC, ADM, CCR4, RYR3, CP, PRNP, PMP22, IFI6, CLN5	710	380	14116	1.62193	1	0.235132	16.0507
GOTERM_BP_ALL	GO:0051179~localization	177	21.0965	0.00971341	PVR, CGA, GRPEL1, GABRB2, UNC50, AQP1, SLC35A2, SLC35A3, CTNNB1, ATP2B1, SLC25A20, CD44, APOE, SLC2A3, SLC25A24, HOMER3, SLC2A1, DNAJC6, MS4A2, NUP37, SAR1B, SLC4A3, FTL, CHRNA2, SLC33A1, GOLT1B, PDPN, RINT1, ARNTL, CNGA3, NUPL1, TIMM8B, SLC25A32, TRIM36, CCR4, RYR3, LRP12, VAMP5, TRAPPC4, VAMP4, CAMK1, LAMC1, CROT, CHMP2A, DERL2, SLC2A10, FXYD3, CCL2, CNIH, RBP1, TNFRSF12A, SLC38A6, AKAP12, SNX2…	710	2993	14116	1.17576	1	0.234263	16.1226
GOTERM_BP_ALL	GO:0040017~positive regulation of locomotion	12	1.43027	0.00999244	IL6, IL8, PDPN, PDGFA, CCR4, IL6ST, F3, RRAS2, ILK, SCARB1, TRIP6, SCG2	710	98	14116	2.43449	1	0.238259	16.5473
GOTERM_BP_ALL	GO:0031589~cell-substrate adhesion	12	1.43027	0.00999244	DLC1, CD44, TNFRSF12A, ITGB1BP1, FXC1, ILK, ITGA7, ITGB5, ACTN1, LAMC1, TRIP6, CTNNB1	710	98	14116	2.43449	1	0.238259	16.5473
GOTERM_BP_ALL	GO:0042592~homeostatic process	53	6.31704	0.0113682	LDLR, GLRA1, IL6ST, HEXB, PRDX4, MPV17, BNIP3, PDIA4, BUD31, CTNNB1, AGTR1, CASP3, CUL5, APOE, HMOX1, ILK, SERPINE1, RGN, FAS, SLC22A5, IL1A, FTL, BBS10, DDIT3, ADM, CCR4, RYR3, TXN, PMP22, PRNP, CLN5, CCL2, MCL1, HFE, OXTR, ABCA1, CALR, FKBP1B, POT1, TIMP1, SLC30A5, SCARB1, NEDD4L, GLRX, IL6, ACACA, NDFIP1, ITPR1, SOD2, HSP90B1, TFRC, CP, IFI6	710	751	14116	1.4031	1	0.264399	18.6117
GOTERM_BP_ALL	GO:0031397~negative regulation of protein ubiquitination	10	1.1919	0.0115295	PSMA1, PSMD14, PSMC6, PSMD13, PSMC2, PSMB3, PSMB2, UBB, PSMB8, PSMD9	710	74	14116	2.68671	1	0.265593	18.8504
GOTERM_BP_ALL	GO:0008283~cell proliferation	34	4.05244	0.0123904	TUSC2, BCAT1, FGF5, COPS2, ZAK, OSMR, PDGFA, NDP, PSPH, FKBP1B, CTNNB1, ISG20, CUL5, HMOX1, TGFBI, ILK, GRPR, MAS1, MS4A2, SCARB1, IFRD2, IL1A, DLG1, GNAT1, PDPN, MET, CSRP2, MMP14, LAMP3, EPS8, TXN, FABP7, MPL, EMP1	710	436	14116	1.55041	1	0.280339	20.1141
GOTERM_BP_ALL	GO:0010038~response to metal ion	14	1.66865	0.0128748	GGH, LEF1, CNGA3, MT1X, CTNNB1, TNFRSF11B, FGA, TFRC, CYBRD1, SLC30A5, NEDD4L, PRNP, IGFBP2, PDCD6	710	129	14116	2.1577	1	0.287479	20.8169
GOTERM_BP_ALL	GO:0009719~response to endogenous stimulus	32	3.81406	0.0129737	CGA, CCL2, LDLR, PDGFA, LEPR, AP3S1, OXTR, ASNS, GNG12, AQP1, CTNNB1, TNFRSF11B, KRAS, HMOX1, ANGPT1, FAS, LOX, RNF14, SPP1, IL6, IL1RN, GGH, MMP14, CNGA3, DDIT3, LEP, GRB10, ADM, FABP3, IGFBP2, AACS, VLDLR	710	405	14116	1.5709	1	0.287248	20.9597
GOTERM_BP_ALL	GO:0031401~positive regulation of protein modification process	18	2.14541	0.0131414	DLC1, IL6, IL6ST, NDFIP1, PSMB8, UBE2N, CCNB1, LIF, PSMA1, PSMC6, PSMD14, FNTA, PSMD13, PSMB3, PSMC2, PSMB2, UBB, PSMD9	710	187	14116	1.91375	1	0.288298	21.2012
GOTERM_BP_ALL	GO:0006354~RNA elongation	8	0.953516	0.0132226	POLR2H, TAF10, POLR2G, POLR2L, TAF9, POLR2C, GTF2H1, POLR2A	710	51	14116	3.1187	1	0.28774	21.3179
GOTERM_BP_ALL	GO:0008654~phospholipid biosynthetic process	12	1.43027	0.0132815	PIGL, PIGG, PIK3C2A, HEXB, FABP3, PIGB, PTDSS1, CHPT1, PLA2G5, PLAUR, PIGN, PTDSS2	710	102	14116	2.33902	1	0.286783	21.4025
GOTERM_BP_ALL	GO:0045445~myoblast differentiation	5	0.595948	0.0133733	LGALS1, CSRP2, IFRD1, PITX1, CTNNB1	710	19	14116	5.23202	1	0.286437	21.534
GOTERM_BP_ALL	GO:0032270~positive regulation of cellular protein metabolic process	21	2.50298	0.0137269	DLC1, IL6, IL6ST, NDFIP1, PSMB8, UBE2N, CCNB1, LIF, AGTR1, PSMA1, PSMC6, PSMD14, PSMD13, FNTA, APOE, PSMB3, PSMC2, PSMB2, BCL3, UBB, PSMD9	710	233	14116	1.79191	1	0.290794	22.0392
GOTERM_BP_ALL	GO:0065008~regulation of biological quality	93	11.0846	0.0145669	DLC1, CGA, LDLR, GLRA1, IL6ST, CAPZA2, HEXB, PRDX4, MPV17, BNIP3, PDIA4, BUD31, CTNNB1, AGTR1, CASP3, CUL5, APOE, HMOX1, ILK, SERPINE1, RGN, SLC22A5, FAS, IL1A, FTL, CGRRF1, PDPN, BBS10, DDIT3, PLAUR, ANXA2P2, ADM, CCR4, F3, RYR3, TXN, TFPI, UBB, PRNP, PMP22, EMP3, CLN5, EMP1, GGCX, DERL2, CCL2, RBP1, MCL1, TNFRSF12A, OXTR, HFE, ARF6, ARPC5, ABCA1, CALR, FKBP1B, POT1, TIMP1, KRAS, FGA, ARPC3, ARP…	710	1469	14116	1.25868	1	0.303577	23.2264
GOTERM_BP_ALL	GO:0050801~ion homeostasis	32	3.81406	0.0147428	CCL2, GLRA1, IL6ST, HEXB, OXTR, BNIP3, HFE, CALR, BUD31, FKBP1B, AGTR1, CUL5, APOE, HMOX1, ILK, RGN, SLC30A5, NEDD4L, FTL, NDFIP1, ITPR1, SOD2, HSP90B1, TFRC, ADM, CCR4, RYR3, CP, PRNP, PMP22, IFI6, CLN5	710	409	14116	1.55554	1	0.304568	23.4729
GOTERM_BP_ALL	GO:0043933~macromolecular complex subunit organization	50	5.95948	0.0147854	GLRA1, TUBB2A, CAPZA2, AP2S1, TSPAN4, CTNNB1, AGTR1, TRIM5, APOE, IL1RAP, GPX3, ILK, SH3BGR, ANGPT1, FAS, SNAPC5, DARS, PCBD1, SNUPN, MPP6, GTF2H1, TAF10, IPO7, TBCA, PLA2G2A, LAMC1, PRNP, PARVA, POLR2H, POLR2G, NUP98, POLR2L, HFE, ARPC4, ABCA1, CALR, POLR2C, POLR2A, TNFRSF1A, FGA, ICT1, SCARB1, TAF9, TNPO1, ANGPTL4, ANXA5, MIS12, SOD2, IRF7, CAPG	710	710	14116	1.40012	1	0.30326	23.5325
GOTERM_BP_ALL	GO:0010647~positive regulation of cell communication	27	3.21812	0.0149951	CCL2, LITAF, IL6ST, LEPR, OXTR, CTNNB1, LIF, TMED7, TNFRSF1A, TMEM9B, KRAS, MYD88, HMOX1, ILK, NENF, CASP1, CFLAR, IL6, GOLT1B, LGALS1, NDFIP1, UBE2N, LEP, IKBKE, NRAS, F3, UBB	710	329	14116	1.63163	1	0.304813	23.8251
GOTERM_BP_ALL	GO:0050729~positive regulation of inflammatory response	6	0.715137	0.0158046	AGTR1, TNFRSF1A, IL6, OSMR, IL6ST, PLA2G2A	710	30	14116	3.97634	1	0.316356	24.9449
GOTERM_BP_ALL	GO:0042060~wound healing	18	2.14541	0.0159237	GGCX, IL6, PDGFA, EFEMP2, ANXA5, PLAUR, CCNB1, PLSCR1, FGA, CD44, ITGA5, HMOX1, F3, SERPINE1, TFPI, SCARB1, LOX, GAP43	710	191	14116	1.87367	1	0.316267	25.1083
GOTERM_BP_ALL	GO:0043627~response to estrogen stimulus	12	1.43027	0.0162426	TNFRSF11B, LDLR, PDGFA, HMOX1, LEPR, OXTR, ANGPT1, AQP1, MMP14, IGFBP2, RNF14, CTNNB1	710	105	14116	2.27219	1	0.319438	25.5443
GOTERM_BP_ALL	GO:0022607~cellular component assembly	60	7.15137	0.0163526	DLC1, GLRA1, PDGFA, TUBB2A, TSPAN4, CAPZA2, AP2S1, CTNNB1, TRIM5, APOE, IL1RAP, ILK, GPX3, SH3BGR, ANGPT1, FAS, LOX, SNAPC5, DARS, PCBD1, SNUPN, ACTN1, MPP6, BBS10, GTF2H1, TAF10, IPO7, TBCA, LAMC1, PRNP, PMP22, PARVA, POLR2H, POLR2G, NUP98, ATG12, POLR2L, HFE, NEDD9, ARPC4, ABCA1, CALR, POLR2C, POT1, POLR2A, TNFRSF1A, FGA, OBSL1, TAF9, TNPO1, ANGPTL4, VAV3, ARFIP2, ANXA5, MIS12, SOD2, ITGA5, IRF…	710	887	14116	1.34487	1	0.319181	25.694
GOTERM_BP_ALL	GO:0016064~immunoglobulin mediated immune response	8	0.953516	0.0177857	MYD88, MASP2, SWAP70, CD46, CRP, C1RL, BCL3, CFI	710	54	14116	2.94544	1	0.339817	27.62
GOTERM_BP_ALL	GO:0008629~induction of apoptosis by intracellular signals	8	0.953516	0.0177857	CASP3, CUL5, RNF7, NUPR1, HMOX1, BCL3, DIABLO, MBD4	710	54	14116	2.94544	1	0.339817	27.62
GOTERM_BP_ALL	GO:0002455~humoral immune response mediated by circulating immunoglobulin	6	0.715137	0.0180864	MASP2, CD46, CRP, C1RL, BCL3, CFI	710	31	14116	3.84807	1	0.34236	28.0181
GOTERM_BP_ALL	GO:0019319~hexose biosynthetic process	6	0.715137	0.0180864	TPI1, ATF3, SDS, PCK2, PMM2, G6PC3	710	31	14116	3.84807	1	0.34236	28.0181
GOTERM_BP_ALL	GO:0009725~response to hormone stimulus	29	3.4565	0.0183721	CGA, CCL2, LDLR, PDGFA, LEPR, AP3S1, OXTR, GNG12, AQP1, CTNNB1, TNFRSF11B, KRAS, HMOX1, ANGPT1, FAS, LOX, RNF14, SPP1, IL6, IL1RN, GGH, MMP14, CNGA3, LEP, GRB10, ADM, FABP3, IGFBP2, VLDLR	710	367	14116	1.57103	1	0.34463	28.3944
GOTERM_BP_ALL	GO:0001501~skeletal system development	26	3.09893	0.0184986	IBSP, TUFT1, HEXB, TIPARP, POSTN, HOXD10, CTNNB1, HOXD11, PEX7, HOXC6, TNFRSF11B, HOXA2, LECT1, HOXA5, HOXC4, GPNMB, PCSK5, PITX1, SPP1, MMP14, WWTR1, ANXA2, HOXC10, PHEX, EXT2, IGFBP5	710	319	14116	1.62045	1	0.344458	28.5605
GOTERM_BP_ALL	GO:0042770~DNA damage response, signal transduction	10	1.1919	0.0185813	TRIAP1, SP100, NUPR1, ZAK, HMOX1, HUS1, RINT1, BCL3, MBD4, NEK11	710	80	14116	2.48521	1	0.343632	28.6689
GOTERM_BP_ALL	GO:0044085~cellular component biogenesis	66	7.86651	0.0186463	DLC1, RPL14, GLRA1, PDGFA, TUBB2A, TSPAN4, CAPZA2, AP2S1, PEX3, CTNNB1, TRIM5, EBNA1BP2, APOE, IL1RAP, ILK, GPX3, SH3BGR, ANGPT1, FAS, LOX, SNAPC5, DARS, PCBD1, SNUPN, ACTN1, MPP6, BBS10, GTF2H1, TAF10, IPO7, TBCA, LAMC1, PRNP, PMP22, PARVA, POLR2H, POLR2G, NUP98, ATG12, POLR2L, UTP6, NEDD9, HFE, ARPC4, ABCA1, CALR, POLR2C, POT1, POLR2A, MINA, TNFRSF1A, FGA, PEX16, OBSL1, TAF9, TNPO1, ANGPTL4, VA…	710	1001	14116	1.31088	1	0.342551	28.7538
GOTERM_BP_ALL	GO:0009607~response to biotic stimulus	30	3.57569	0.0187172	DERL2, CCL2, CCL8, BNIP3, APOBEC3F, IFI35, ISG20, TRIM5, TNFRSF1A, MYD88, CCL20, BCL3, SCARB1, HSPE1, HSPA5, PTX3, IL6, IFI44, CLIC1, HBXIP, DDIT3, PLSCR1, ADM, CCR4, IRF7, HSPB7, PLA2G2A, HSPB2, PPP1R15A, VLDLR	710	384	14116	1.55326	1	0.341575	28.8466
GOTERM_BP_ALL	GO:0014910~regulation of smooth muscle cell migration	4	0.476758	0.0197511	PDGFA, IL6ST, ILK, IGFBP5	710	12	14116	6.62723	1	0.354674	30.1848
GOTERM_BP_ALL	GO:0046164~alcohol catabolic process	10	1.1919	0.0200071	LDHA, TPI1, UEVLD, HK3, PKM2, HK2, DLAT, PGK1, GAPDH, MDH2	710	81	14116	2.45453	1	0.356298	30.5125
GOTERM_BP_ALL	GO:0006367~transcription initiation from RNA polymerase II promoter	9	1.07271	0.0201591	POLR2H, TAF10, POLR2G, POLR2L, IRF7, TAF9, POLR2C, GTF2H1, POLR2A	710	68	14116	2.6314	1	0.356418	30.7064
GOTERM_BP_ALL	GO:0051247~positive regulation of protein metabolic process	21	2.50298	0.0206655	DLC1, IL6, IL6ST, NDFIP1, PSMB8, UBE2N, CCNB1, LIF, AGTR1, PSMA1, PSMC6, PSMD14, PSMD13, FNTA, APOE, PSMB3, PSMC2, PSMB2, BCL3, UBB, PSMD9	710	243	14116	1.71817	1	0.36152	31.3486
GOTERM_BP_ALL	GO:0006955~immune response	48	5.7211	0.0207248	CCL2, CXCL5, CNIH, MASP2, CXCL3, CRP, HFE, CCL8, BNIP3, OAS1, APOBEC3F, IFI35, CD97, LIF, AZGP1, TNFRSF1A, TMED7, MYD88, CCL20, CD46, IL1RAP, CNR2, BCL3, MS4A2, FAS, CFI, PTX3, IL1RAPL2, IL1A, IL6, CEBPB, SP100, IL8, BST1, SWAP70, IL1RN, CD1A, CD164, PSMB8, CD83, IKBKE, C1QBP, CXCL14, CCR4, CD300A, C1RL, CLEC5A, IFI6	710	690	14116	1.38307	1	0.360312	31.4234
GOTERM_BP_ALL	GO:0043085~positive regulation of catalytic activity	38	4.5292	0.0208711	DLC1, ZAK, SDC4, BUD31, POT1, AGTR1, HRH1, KRAS, FNTA, APOE, PSMB3, ILK, PSMB2, RGN, DIABLO, MS4A2, SCARB1, HSPE1, MC3R, PSMD9, VAV3, MET, CYCS, HOMER1, PSMB8, UBE2N, CCNB1, PSMA1, PSMD14, PSMC6, PSMD13, PSMC2, IFT57, F3, UBB, GADD45B, GAP43, VLDLR	710	520	14116	1.45289	1	0.360323	31.6077
GOTERM_BP_ALL	GO:0007154~cell communication	54	6.43623	0.0209072	TUSC2, FGF5, CGA, LDHA, GLRA1, GABRB2, PDGFA, LEPR, HEXB, CTNNB1, HOXD11, CD97, SPRY2, SPRY1, FNTA, APOE, HMOX1, ILK, TAAR5, PIK3C2A, EFNB2, PCDH8, TNFAIP6, GRB10, ADM, APITD1, TXN, TFAP2C, UBB, PMP22, SNX10, SNX11, PPFIA4, CXCL5, ATG12, NDP, SNX2, HFE, CCL8, OXTR, ASNS, SNX3, FKBP1B, HRH1, SYPL1, CCL20, HSPA5, PCSK5, IL6, LIN7C, HOMER1, LEP, CXCL14, PHEX	710	795	14116	1.35045	1	0.35882	31.6531
GOTERM_BP_ALL	GO:0009615~response to virus	12	1.43027	0.0209265	TRIM5, PLSCR1, IL6, IRF7, CCL8, BCL3, BNIP3, IFI44, HBXIP, APOBEC3F, IFI35, ISG20	710	109	14116	2.18881	1	0.357103	31.6774
GOTERM_BP_ALL	GO:0008610~lipid biosynthetic process	26	3.09893	0.0211926	CYP51A1, HEXB, HSD17B12, PEX7, TPI1, PIGL, PIGG, ELOVL2, PIGB, SCARB1, ELOVL6, PTDSS1, PTDSS2, ACAA2, PIK3C2A, UGCG, ACACA, CHPT1, PIGN, C9ORF3, PLAUR, ADM, ST8SIA5, FABP3, SMPD1, PLA2G5	710	323	14116	1.60038	1	0.358767	32.0111
GOTERM_BP_ALL	GO:0031099~regeneration	9	1.07271	0.0218361	LIF, CCNB1, CCL2, FGA, ADM, SERPINE1, ANGPT1, GAP43, PLAUR	710	69	14116	2.59326	1	0.365468	32.8117
GOTERM_BP_ALL	GO:0034637~cellular carbohydrate biosynthetic process	9	1.07271	0.0218361	TPI1, GBE1, ATF3, SDS, PCK2, EXT2, PMM2, G6PC3, HS2ST1	710	69	14116	2.59326	1	0.365468	32.8117
GOTERM_BP_ALL	GO:0006352~transcription initiation	10	1.1919	0.0230927	POLR2H, SNAPC5, TAF10, POLR2G, POLR2L, IRF7, TAF9, POLR2C, GTF2H1, POLR2A	710	83	14116	2.39538	1	0.380027	34.3496
GOTERM_BP_ALL	GO:0007229~integrin-mediated signaling pathway	9	1.07271	0.0236093	CD47, VAV3, ITGA5, ITGB1BP1, ILK, ITGA7, ITGB5, NEDD9, ADAM8	710	70	14116	2.55622	1	0.384671	34.972
GOTERM_BP_ALL	GO:0002449~lymphocyte mediated immunity	9	1.07271	0.0236093	MYD88, MASP2, SWAP70, CD46, CRP, C1RL, BCL3, FAS, CFI	710	70	14116	2.55622	1	0.384671	34.972
GOTERM_BP_ALL	GO:0019637~organophosphate metabolic process	18	2.14541	0.0238451	PIK3C2A, HEXB, CHPT1, PLAUR, PIGN, SACM1L, TPI1, PIGL, PIGG, PIGB, FABP3, SMPD1, PLA2G2A, SYNJ2, PLA2G3, PTDSS1, PLA2G5, PTDSS2	710	200	14116	1.78935	1	0.385665	35.2543
GOTERM_BP_ALL	GO:0009952~anterior/posterior pattern formation	14	1.66865	0.0238746	LEF1, PCDH8, HOXD10, HOXD11, CTNNB1, HES1, HOXC10, HOXC6, HOXA1, HOXA2, MEOX2, HOXA5, HOXC4, PCSK5	710	140	14116	1.98817	1	0.384039	35.2895
GOTERM_BP_ALL	GO:0009967~positive regulation of signal transduction	24	2.86055	0.0244392	CFLAR, IL6, LITAF, GOLT1B, IL6ST, LGALS1, LEPR, NDFIP1, CTNNB1, UBE2N, LEP, LIF, TMED7, IKBKE, NRAS, TNFRSF1A, TMEM9B, KRAS, MYD88, HMOX1, F3, ILK, NENF, CASP1	710	295	14116	1.61749	1	0.389141	35.9604
GOTERM_BP_ALL	GO:0044255~cellular lipid metabolic process	38	4.5292	0.0245984	ACOX2, RARRES2, RBP1, IL6ST, HEXB, ECHDC2, PEX7, TNFRSF1A, PIGL, TPI1, PIGG, APOE, ELOVL2, PIGB, SYNJ2, ELOVL6, PTDSS1, PTDSS2, ACAA2, PDPN, PIK3C2A, UGCG, ACACA, LYPLA1, CHPT1, PLAUR, C9ORF3, PIGN, SACM1L, LEP, ST8SIA5, SMPD1, PLA2G2A, FABP3, PLA2G3, AACS, PLA2G5, CROT	710	526	14116	1.43632	1	0.389133	36.1484
GOTERM_BP_ALL	GO:0002526~acute inflammatory response	11	1.31108	0.0251564	IL6, CEBPB, NUPR1, TFRC, MASP2, F3, CD46, CRP, C1RL, CFI, IL1A	710	98	14116	2.23162	1	0.394019	36.8032
GOTERM_BP_ALL	GO:0008285~negative regulation of cell proliferation	28	3.33731	0.0251875	DLC1, AZGP1, CASP3, CUL5, APOE, HMOX1, ILK, CDK10, GPNMB, IL1A, SCG2, IL6, CGRRF1, IL8, NDFIP1, TAX1BP3, CDKN3, CD164, SOD2, NUPR1, ADM, PLA2G2A, FABP3, PMP22, FABP7, EMP3, IGFBP5, TOB1	710	361	14116	1.54207	1	0.392423	36.8394
GOTERM_BP_ALL	GO:0042158~lipoprotein biosynthetic process	8	0.953516	0.0254538	PIGL, FNTA, PIGG, APOE, PIGB, ABCA1, PLAUR, PIGN	710	58	14116	2.7423	1	0.39369	37.1496
GOTERM_BP_ALL	GO:0065003~macromolecular complex assembly	46	5.48272	0.0257284	POLR2H, POLR2G, NUP98, POLR2L, GLRA1, TUBB2A, TSPAN4, AP2S1, CAPZA2, HFE, ARPC4, ABCA1, CALR, POLR2C, CTNNB1, POLR2A, TNFRSF1A, TRIM5, FGA, APOE, IL1RAP, ILK, GPX3, SH3BGR, TAF9, ANGPT1, FAS, TNPO1, ANGPTL4, SNAPC5, DARS, PCBD1, SNUPN, MPP6, ANXA5, MIS12, SOD2, GTF2H1, TAF10, TBCA, IPO7, IRF7, CAPG, LAMC1, PRNP, PARVA	710	665	14116	1.37527	1	0.395039	37.4678
GOTERM_BP_ALL	GO:0007044~cell-substrate junction assembly	5	0.595948	0.0260818	DLC1, ITGA5, ACTN1, LAMC1, TRIP6	710	23	14116	4.32211	1	0.397302	37.875
GOTERM_BP_ALL	GO:0030195~negative regulation of blood coagulation	5	0.595948	0.0260818	PDGFA, APOE, SERPINE1, ANXA2P2, ANXA2	710	23	14116	4.32211	1	0.397302	37.875
GOTERM_BP_ALL	GO:0048878~chemical homeostasis	37	4.41001	0.0263087	CCL2, LDLR, GLRA1, IL6ST, HEXB, HFE, OXTR, BNIP3, ABCA1, CALR, FKBP1B, BUD31, AGTR1, CUL5, APOE, HMOX1, ILK, SERPINE1, RGN, SLC30A5, SCARB1, NEDD4L, FTL, ACACA, NDFIP1, ITPR1, SOD2, HSP90B1, TFRC, ADM, CCR4, RYR3, CP, PRNP, PMP22, IFI6, CLN5	710	512	14116	1.43676	1	0.398043	38.1352
GOTERM_BP_ALL	GO:0044275~cellular carbohydrate catabolic process	10	1.1919	0.0265041	LDHA, TPI1, UEVLD, HK3, PKM2, HK2, DLAT, PGK1, GAPDH, MDH2	710	85	14116	2.33902	1	0.398408	38.3585
GOTERM_BP_ALL	GO:0006366~transcription from RNA polymerase II promoter	20	2.38379	0.026792	POLR2H, COPS2, MAFF, SNAPC5, POLR2G, TRIP4, NMI, CEBPB, POLR2L, LMO4, POLR2C, DDIT3, POLR2A, GTF2H1, TAF10, MAX, NRL, IRF7, PIR, TAF9	710	234	14116	1.69929	1	0.399841	38.686
GOTERM_BP_ALL	GO:0009056~catabolic process	79	9.41597	0.0269183	ACOX2, LDHA, LDLR, HEXB, BNIP3, PEX7, FAH, ISG20, AUH, AZGP1, TRIM5, CASP3, CUL5, APOE, HMOX1, GPX3, DERA, CTBS, PSMD9, TM9SF1, CYCS, MBD4, UBE2NL, GTF2H1, UBE2N, GNS, PSMA1, SDS, FBXO17, PKM2, PLA2G2A, UCHL3, UBB, PLA2G3, ASB4, CLN5, MDH2, PLA2G5, BCAT1, DERL2, ATG12, HK2, UPP1, RNH1, KMO, RPA3, UEVLD, TPI1, UFM1, PSMB3, HK3, PSMB2, SCARB1, NEDD4L, GAPDH, USP33, FBXO9, RNF14, CHI3L1, CHI3L2, PCN…	710	1253	14116	1.25351	1	0.399393	38.8292
GOTERM_BP_ALL	GO:0001944~vasculature development	21	2.50298	0.0280663	IL8, PDPN, TNFRSF12A, PDGFA, LEPR, EFNB2, TIPARP, MMP14, CTNNB1, ANXA2P2, ANXA2, MEOX2, CD44, APOE, HMOX1, ITGA7, ANGPT1, LOX, ANGPT2, ANGPTL4, SCG2	710	251	14116	1.66341	1	0.410561	40.116
GOTERM_BP_ALL	GO:0050896~response to stimulus	199	23.7187	0.0281478	CGA, LDHA, MASP2, OSMR, IL6ST, AQP1, HOXD10, ISG20, CTNNB1, CUL5, MYD88, CD44, PLOD2, APOE, CD46, SERPINE1, FAS, CFI, HIGD1A, CGRRF1, PDPN, RINT1, IFI44, RIC8A, PLAUR, GRB10, CCR4, F3, PLA2G2A, TFPI, CLEC5A, GGCX, TPST1, CNIH, HUS1, NTAN1, HFE, OAS1, IFI35, LIF, KRAS, IL1RAPL2, SPP1, GNAT1, IL1RN, GGH, ACACA, GNAT3, EI24, EPS8, CD300A, GLRA1, LDLR, AP3S1, BNIP3, TRIAP1, TNFRSF11B, IL1RAP, GPX3, A…	710	3502	14116	1.12977	1	0.409561	40.2064
GOTERM_BP_ALL	GO:0016044~membrane organization	29	3.4565	0.0282006	SEC24A, LDLR, AP2S1, CRP, TIMM10, SNX2, BNIP3, HFE, SNX3, ABCA1, AP1S1, KRAS, APOE, FXC1, COPB1, DNAJC6, SCARB1, SAR1B, PTX3, SEC24D, FTL, VAV3, TIMM8B, PLSCR1, NRAS, TFRC, LRP12, GCA, VLDLR	710	381	14116	1.5133	1	0.408252	40.265
GOTERM_BP_ALL	GO:0002443~leukocyte mediated immunity	10	1.1919	0.0283368	IL6, MYD88, MASP2, SWAP70, CD46, CRP, C1RL, BCL3, FAS, CFI	710	86	14116	2.31182	1	0.407882	40.4155
GOTERM_BP_ALL	GO:0048584~positive regulation of response to stimulus	20	2.38379	0.0288693	PVR, IL6, IL8, OSMR, MASP2, IL6ST, CRP, UBE2N, AGTR1, TNFRSF1A, MYD88, CCR4, F3, CD46, IRF7, PLA2G2A, C1RL, TAF9, CFI, SCG2	710	236	14116	1.68489	1	0.411881	41.001
GOTERM_BP_ALL	GO:0031349~positive regulation of defense response	9	1.07271	0.0295305	PVR, AGTR1, TNFRSF1A, IL6, MYD88, OSMR, IL6ST, IRF7, PLA2G2A	710	73	14116	2.45117	1	0.417202	41.7204
GOTERM_BP_ALL	GO:0006644~phospholipid metabolic process	17	2.02622	0.0299585	PIK3C2A, HEXB, CHPT1, PLAUR, PIGN, SACM1L, PIGL, PIGG, PIGB, FABP3, SMPD1, PLA2G2A, SYNJ2, PLA2G3, PTDSS1, PLA2G5, PTDSS2	710	190	14116	1.77889	1	0.419926	42.1816
GOTERM_BP_ALL	GO:0006308~DNA catabolic process	8	0.953516	0.0300262	UBE2N, CASP3, CYCS, BNIP3, MBD4, ISG20, RPA3, GTF2H1	710	60	14116	2.65089	1	0.418775	42.2542
GOTERM_BP_ALL	GO:0044093~positive regulation of molecular function	41	4.88677	0.0302613	DLC1, ZAK, SDC4, BUD31, POT1, AGTR1, HRH1, MYD88, KRAS, FNTA, APOE, PSMB3, ILK, PSMB2, RGN, DIABLO, MS4A2, SCARB1, HSPE1, MC3R, PSMD9, IL6, VAV3, SP100, MET, CYCS, HOMER1, PSMB8, UBE2N, CCNB1, PSMA1, PSMD14, PSMC6, PSMD13, PSMC2, IFT57, F3, UBB, GADD45B, GAP43, VLDLR	710	586	14116	1.39104	1	0.419413	42.5058
GOTERM_BP_ALL	GO:0046483~heterocycle metabolic process	26	3.09893	0.0303918	UPP1, KMO, ATP5G1, PIPOX, ATP2B1, MTHFS, ALAS1, P4HA2, HMOX1, ATP5S, DERA, ATP5L, LIAS, PTS, DCTD, PCBD1, HMBS, ATP5F1, MBD4, RBKS, ATP13A3, ATP6V1D, ATP6V1C1, NME5, ADM, GUK1	710	334	14116	1.54768	1	0.418941	42.645
GOTERM_BP_ALL	GO:0043410~positive regulation of MAPKKK cascade	7	0.834327	0.0320655	LIF, LEP, IL6, LEPR, ILK, NENF, CTNNB1	710	48	14116	2.89941	1	0.434452	44.4023
GOTERM_BP_ALL	GO:0051346~negative regulation of hydrolase activity	7	0.834327	0.0320655	GNAT1, LEPR, HSPA5, HBXIP, FKBP1B, IFI6, ANGPTL4	710	48	14116	2.89941	1	0.434452	44.4023
GOTERM_BP_ALL	GO:0008643~carbohydrate transport	8	0.953516	0.0325071	SLC2A10, SLC2A3, SLC2A1, SLC35A5, SCARB1, SLC35A2, SLC35A3, G6PC3	710	61	14116	2.60743	1	0.43707	44.8574
GOTERM_BP_ALL	GO:0040012~regulation of locomotion	17	2.02622	0.032565	DLC1, IL6, IL8, PDPN, PDGFA, IL6ST, APOE, CCR4, HMOX1, F3, RRAS2, ILK, RRAS, SCARB1, TRIP6, IGFBP5, SCG2	710	192	14116	1.76036	1	0.435792	44.9168
GOTERM_BP_ALL	GO:0045039~protein import into mitochondrial inner membrane	3	0.357569	0.0330187	FXC1, TIMM10, TIMM8B	710	6	14116	9.94085	1	0.43849	45.3804
GOTERM_BP_ALL	GO:0015780~nucleotide-sugar transport	3	0.357569	0.0330187	SLC35A5, SLC35A2, SLC35A3	710	6	14116	9.94085	1	0.43849	45.3804
GOTERM_BP_ALL	GO:0007160~cell-matrix adhesion	10	1.1919	0.0343648	DLC1, CD44, ITGB1BP1, FXC1, ILK, ITGA7, ITGB5, ACTN1, TRIP6, CTNNB1	710	89	14116	2.2339	1	0.449899	46.7337
GOTERM_BP_ALL	GO:0006094~gluconeogenesis	5	0.595948	0.0344428	TPI1, ATF3, SDS, PCK2, G6PC3	710	25	14116	3.97634	1	0.448797	46.8112
GOTERM_BP_ALL	GO:0001525~angiogenesis	14	1.66865	0.0354288	IL8, TNFRSF12A, PDGFA, LEPR, MMP14, ANXA2, ANXA2P2, CTNNB1, MEOX2, HMOX1, ANGPT1, ANGPT2, ANGPTL4, SCG2	710	148	14116	1.8807	1	0.456416	47.7811
GOTERM_BP_ALL	GO:0080134~regulation of response to stress	22	2.62217	0.0359776	PVR, IL6, ZAK, PDPN, OSMR, PDGFA, IL6ST, AP2S1, NDFIP1, APOBEC3F, ANXA2, ANXA2P2, UBE2N, AGTR1, TNFRSF1A, MYD88, APOE, F3, IRF7, SERPINE1, PLA2G2A, SPP1	710	274	14116	1.59634	1	0.459752	48.3136
GOTERM_BP_ALL	GO:0007626~locomotory behavior	22	2.62217	0.0359776	PLP2, IL6, CCL2, GLRA1, IL8, CXCL5, PDGFA, CXCL3, NPY2R, HEXB, TBCE, NTAN1, CCL8, HOXD10, SOD2, PLAUR, NPAS3, CXCL14, EPS8, CCL20, CCR4, SCG2	710	274	14116	1.59634	1	0.459752	48.3136
GOTERM_BP_ALL	GO:0030198~extracellular matrix organization	11	1.31108	0.0359956	IBSP, TNFRSF11B, TGFBI, ILK, HSD17B12, BCL3, POSTN, LAMC1, LOX, ANXA2P2, ANXA2	710	104	14116	2.10287	1	0.458071	48.331
GOTERM_BP_ALL	GO:0006511~ubiquitin-dependent protein catabolic process	20	2.38379	0.0360296	DERL2, PCNP, UBE2NL, PSMB8, CCNB1, PSMA1, HSP90B1, CUL5, PSMC6, PSMD14, PSMD13, TOM1L1, PSMB3, PSMC2, PSMB2, UCHL3, UBB, TCEB1, USP33, PSMD9	710	242	14116	1.64311	1	0.456552	48.3638
GOTERM_BP_ALL	GO:0046364~monosaccharide biosynthetic process	6	0.715137	0.0363227	TPI1, ATF3, SDS, PCK2, PMM2, G6PC3	710	37	14116	3.22406	1	0.457461	48.6458
GOTERM_BP_ALL	GO:0051241~negative regulation of multicellular organismal process	15	1.78784	0.0367236	IL6, GLRA1, PDGFA, NDFIP1, ANXA5, FKBP1B, ANXA4, ANXA2, ANXA2P2, CD83, TNFRSF11B, ADM, APOE, HMOX1, SERPINE1	710	164	14116	1.81845	1	0.459356	49.0293
GOTERM_BP_ALL	GO:0007155~cell adhesion	47	5.60191	0.037757	DLC1, IBSP, PVR, CCL2, TNFRSF12A, ITGB5, NEDD9, ARF6, CLDN10, POSTN, CD151, CTNNB1, CLDN15, CD97, CD47, AZGP1, CD44, FXC1, TGFBI, ILK, SCARB1, SSX2IP, MSN, GPNMB, ADAM8, SPP1, DLG1, RS1, PDPN, LEF1, PCDH9, CD99, ACTN1, PCDH8, CD164, HES1, TNFAIP6, ITGA5, CD300A, ITGB1BP1, SIGLEC7, CD58, ITGA7, LAMC1, TRIP6, CHL1, PARVA	710	700	14116	1.33491	1	0.466981	50.0053
GOTERM_BP_ALL	GO:0022610~biological adhesion	47	5.60191	0.037867	DLC1, IBSP, PVR, CCL2, TNFRSF12A, ITGB5, NEDD9, ARF6, CLDN10, POSTN, CD151, CTNNB1, CLDN15, CD97, CD47, AZGP1, CD44, FXC1, TGFBI, ILK, SCARB1, SSX2IP, MSN, GPNMB, ADAM8, SPP1, DLG1, RS1, PDPN, LEF1, PCDH9, CD99, ACTN1, PCDH8, CD164, HES1, TNFAIP6, ITGA5, CD300A, ITGB1BP1, SIGLEC7, CD58, ITGA7, LAMC1, TRIP6, CHL1, PARVA	710	701	14116	1.33301	1	0.466159	50.1082
GOTERM_BP_ALL	GO:0051271~negative regulation of cell motion	8	0.953516	0.0378708	DLC1, SP100, APOE, HMOX1, ILK, RRAS, ACTN1, IGFBP5	710	63	14116	2.52466	1	0.464389	50.1117
GOTERM_BP_ALL	GO:0044271~nitrogen compound biosynthetic process	25	2.97974	0.0380241	BCAT1, ASS1, ASNS, KMO, ATP5G1, PSPH, C9ORF95, ATP2B1, ALAS1, ATP5S, ATP5L, PTS, DCTD, PCBD1, HMBS, ATP5F1, ATP13A3, ATP6V1D, MTRR, ATP6V1C1, NME5, ADM, RFK, SMS, PRPS2	710	325	14116	1.52936	1	0.463973	50.2547
GOTERM_BP_ALL	GO:0006875~cellular metal ion homeostasis	17	2.02622	0.0382712	CCL2, IL6ST, HEXB, OXTR, CALR, FKBP1B, BUD31, ITPR1, AGTR1, CUL5, HSP90B1, ADM, APOE, CCR4, RYR3, RGN, NEDD4L	710	196	14116	1.72443	1	0.464398	50.4843
GOTERM_BP_ALL	GO:0002250~adaptive immune response	9	1.07271	0.0389119	MYD88, MASP2, SWAP70, CD46, CRP, C1RL, BCL3, FAS, CFI	710	77	14116	2.32383	1	0.468296	51.0752
GOTERM_BP_ALL	GO:0002460~adaptive immune response based on somatic recombination of immune receptors built from immunoglobulin superfamily domains	9	1.07271	0.0389119	MYD88, MASP2, SWAP70, CD46, CRP, C1RL, BCL3, FAS, CFI	710	77	14116	2.32383	1	0.468296	51.0752
GOTERM_BP_ALL	GO:0051246~regulation of protein metabolic process	38	4.5292	0.0396456	DLC1, ZAK, IL6ST, PDGFA, EIF5, IGF2BP3, CPEB1, CALR, TIMP1, LIF, AGTR1, UEVLD, FNTA, APOE, PSMB3, PSMB2, BCL3, EIF1, TAF9, NEDD4L, PSMD9, IL6, NDFIP1, ARNTL, UBE2NL, PSMB8, PLAUR, UBE2N, CCNB1, PSMA1, PSMD14, PSMC6, PSMD13, PSMC2, UBB, PPP1R15A, EIF4E2, IGFBP5	710	546	14116	1.38371	1	0.472936	51.7435
GOTERM_BP_ALL	GO:0014070~response to organic cyclic substance	12	1.43027	0.0408733	CD83, FNTA, CD44, HMOX1, LEPR, ACACA, SMPD1, OXTR, LEF1, AACS, GNAT3, CTNNB1	710	121	14116	1.97174	1	0.481713	52.8427
GOTERM_BP_ALL	GO:0008203~cholesterol metabolic process	10	1.1919	0.0412223	LEP, ACAA2, CYP27A1, LDLR, CYP51A1, APOE, LEPR, SCARB1, ABCA1, VLDLR	710	92	14116	2.16105	1	0.482893	53.1509
GOTERM_BP_ALL	GO:0006631~fatty acid metabolic process	17	2.02622	0.0413808	ACOX2, ACAA2, PDPN, ACACA, ECHDC2, LYPLA1, PEX7, C9ORF3, LEP, TNFRSF1A, TPI1, ELOVL2, FABP3, ELOVL6, AACS, CROT, PLA2G5	710	198	14116	1.70701	1	0.482458	53.2901
GOTERM_BP_ALL	GO:0006874~cellular calcium ion homeostasis	16	1.90703	0.0425489	CCL2, IL6ST, HEXB, OXTR, CALR, FKBP1B, BUD31, ITPR1, AGTR1, CUL5, HSP90B1, ADM, APOE, CCR4, RYR3, RGN	710	183	14116	1.73829	1	0.490422	54.3047
GOTERM_BP_ALL	GO:0051604~protein maturation	12	1.43027	0.0429812	MASP2, F3, CD46, CRP, C1RL, SPCS1, CFI, MMP14, CASP1, CALR, FKBP1B, PCSK5	710	122	14116	1.95558	1	0.492208	54.675
GOTERM_BP_ALL	GO:0043281~regulation of caspase activity	9	1.07271	0.0442744	DLC1, IFT57, F3, CYCS, DIABLO, HSPE1, HSPA5, HBXIP, IFI6	710	79	14116	2.265	1	0.500914	55.7655
GOTERM_BP_ALL	GO:0006032~chitin catabolic process	3	0.357569	0.0447092	CHI3L1, CHI3L2, CTBS	710	7	14116	8.52072	1	0.502618	56.1266
GOTERM_BP_ALL	GO:0006030~chitin metabolic process	3	0.357569	0.0447092	CHI3L1, CHI3L2, CTBS	710	7	14116	8.52072	1	0.502618	56.1266
GOTERM_BP_ALL	GO:0055114~oxidation reduction	43	5.12515	0.0451199	STEAP3, ACOX2, HCCS, PAM, SEPX1, NDUFB5, LDHA, CYP3A7, CYP51A1, HSD17B12, EGLN3, PRDX4, MOSC2, KMO, UQCRQ, PIPOX, CYP3A43, UEVLD, CBR1, P4HA2, PLOD2, HMOX1, GPX3, LOX, GAPDH, BDH1, GLRX, FTL, SQRDL, MAOB, CYCS, DHRS7B, GMPR, SOD2, MTRR, CYP27A1, DOHH, SDHD, TXN, CYBRD1, CP, DUS4L, MDH2	710	639	14116	1.33789	1	0.504111	56.4652
GOTERM_BP_ALL	GO:0033273~response to vitamin	8	0.953516	0.0469528	SP100, CCL2, CD44, TFRC, PDGFA, ANGPT1, IGFBP2, SPP1	710	66	14116	2.4099	1	0.516605	57.946
GOTERM_BP_ALL	GO:0045165~cell fate commitment	13	1.54946	0.0470929	MCL1, HOXD10, HOXD11, CTNNB1, HES1, HOXC10, SPRY2, SPRY1, HOXA2, CASP3, IFRD1, PITX1, GAP43	710	139	14116	1.85944	1	0.515917	58.0572
GOTERM_BP_ALL	GO:0042157~lipoprotein metabolic process	9	1.07271	0.0471291	PIGL, FNTA, LDLR, PIGG, APOE, PIGB, ABCA1, PLAUR, PIGN	710	80	14116	2.23669	1	0.514442	58.0859
GOTERM_BP_ALL	GO:0009308~amine metabolic process	29	3.4565	0.0479206	BCAT1, CGA, ASS1, HEXB, KMO, ASNS, PSPH, HS2ST1, AUH, FAH, P4HA2, PTS, CTBS, CARS, DARS, CHI3L1, GGH, CHI3L2, DALRD3, SLC3A1, CHPT1, MTRR, GNS, SDS, GLS, FABP3, EXT2, SMS, PLA2G5	710	400	14116	1.44142	1	0.518695	58.7086
GOTERM_BP_ALL	GO:0046394~carboxylic acid biosynthetic process	14	1.66865	0.0484262	BCAT1, ASS1, ACACA, ASNS, PSPH, MTRR, C9ORF3, TPI1, SDS, ELOVL2, LIAS, GSTO1, ELOVL6, PLA2G5	710	155	14116	1.79577	1	0.520745	59.1018
GOTERM_BP_ALL	GO:0016053~organic acid biosynthetic process	14	1.66865	0.0484262	BCAT1, ASS1, ACACA, ASNS, PSPH, MTRR, C9ORF3, TPI1, SDS, ELOVL2, LIAS, GSTO1, ELOVL6, PLA2G5	710	155	14116	1.79577	1	0.520745	59.1018
GOTERM_BP_ALL	GO:0046903~secretion	23	2.74136	0.0484985	CGA, IL6, GLRA1, ANXA1, OXTR, LIN7C, CCL8, ABCA1, PDIA4, AQP1, FKBP1B, ANXA2, ANXA2P2, LEP, TRIM36, HMOX1, EXOC3, MS4A2, NEDD4L, YKT6, PCSK5, PLA2G5, SCG2	710	300	14116	1.52426	1	0.519553	59.1577
GOTERM_BP_ALL	GO:0046489~phosphoinositide biosynthetic process	6	0.715137	0.0485566	PIGL, PIGG, PIK3C2A, PIGB, PLAUR, PIGN	710	40	14116	2.98225	1	0.518264	59.2026
GOTERM_BP_ALL	GO:0006497~protein amino acid lipidation	7	0.834327	0.0487298	PIGL, FNTA, PIGG, PIGB, ABCA1, PLAUR, PIGN	710	53	14116	2.62588	1	0.517836	59.3362
GOTERM_BP_ALL	GO:0006518~peptide metabolic process	7	0.834327	0.0487298	PAM, GPX3, SPCS1, PGCP, PCSK5, SOD2, DNPEP	710	53	14116	2.62588	1	0.517836	59.3362
GOTERM_BP_ALL	GO:0051260~protein homooligomerization	10	1.1919	0.0489486	TAF10, GLRA1, PCBD1, GPX3, ANGPT1, FAS, ANXA5, PRNP, SOD2, ANGPTL4	710	95	14116	2.09281	1	0.517749	59.5043
GOTERM_BP_ALL	GO:0015908~fatty acid transport	5	0.595948	0.0495786	SLC25A20, ANXA1, FABP3, CROT, PLA2G5	710	28	14116	3.5503	1	0.52067	59.9848
GOTERM_BP_ALL	GO:0007610~behavior	33	3.93325	0.0496139	CCL2, CXCL5, GLRA1, PDGFA, NPY2R, CXCL3, LEPR, HEXB, CCL8, NTAN1, OXTR, HOXD10, NPAS3, KRAS, CCL20, CNR2, GRPR, SCG2, PLP2, IL6, IL8, MET, TBCE, PLAUR, RIC8A, SOD2, LEP, NRAS, CXCL14, EPS8, CCR4, ITGA5, VLDLR	710	469	14116	1.39892	1	0.519238	60.0115
GOTERM_BP_ALL	GO:0007568~aging	11	1.31108	0.0497164	NRAS, KRAS, TFRC, ADM, ILK, SERPINE1, CP, CALR, IGFBP2, DDIT3, SOD2	710	110	14116	1.98817	1	0.518303	60.0891
GOTERM_BP_ALL	GO:0022603~regulation of anatomical structure morphogenesis	18	2.14541	0.04987	DLC1, IL6, PDPN, TNFRSF12A, RNH1, TNFRSF1A, TNFRSF11B, LECT1, APOE, HMOX1, F3, ILK, ITGA7, SERPINE1, ANGPT2, IL1A, ANGPTL4, SPP1	710	219	14116	1.63411	1	0.517746	60.2052
GOTERM_BP_ALL	GO:0048513~organ development	103	12.2765	0.0501553	DLC1, S100A4, HCCS, CGA, PDGFA, TUFT1, LMO4, PDLIM3, POSTN, HOXD10, HOXD11, CTNNB1, AGTR1, CD44, APOE, HOXC4, ILK, SERPINE1, LOX, FAS, PITX1, PDPN, UGCG, EFNB2, KRT10, CSDA, DDIT3, PLAUR, HES1, VAMP5, LAMC1, EXT2, EMP1, IBSP, CCL2, TNFRSF12A, ARF6, TAGLN2, MDK, TIMP1, LIF, HOXA1, HOXA2, FGA, HOXA5, PPL, OBSL1, SPP1, ANGPTL4, GNAT1, MEA1, MET, EN2, RFNG, CSRP2, HOMER1, TMEM111, ITGA7, FABP7, PHEX,…	710	1738	14116	1.17826	1	0.518141	60.4199
GOTERM_BP_ALL	GO:0016254~preassembly of GPI anchor in ER membrane	4	0.476758	0.0507123	PIGL, PIGG, PIGB, PIGN	710	17	14116	4.67804	1	0.520475	60.8359
GOTERM_BP_ALL	GO:0055074~calcium ion homeostasis	16	1.90703	0.0516936	CCL2, IL6ST, HEXB, OXTR, CALR, FKBP1B, BUD31, ITPR1, AGTR1, CUL5, HSP90B1, ADM, APOE, CCR4, RYR3, RGN	710	188	14116	1.69206	1	0.52577	61.5587
GOTERM_BP_ALL	GO:0051348~negative regulation of transferase activity	10	1.1919	0.0517228	SPRY2, SPRY1, CASP3, RGS3, APOE, ILK, TRIB3, GADD45B, POT1, DUSP6	710	96	14116	2.07101	1	0.524326	61.58
GOTERM_BP_ALL	GO:0006917~induction of apoptosis	24	2.86055	0.0531907	DLC1, CFLAR, VAV3, CEBPB, TM2D1, BNIP3, MBD4, STK17A, CASP3, CUL5, EI24, RNF7, CASP4, NUPR1, TIAM2, APOE, HMOX1, ZNF443, DIABLO, BCL3, UBB, FAS, CASP1, PDCD6	710	320	14116	1.49113	1	0.532874	62.6372
GOTERM_BP_ALL	GO:0052548~regulation of endopeptidase activity	9	1.07271	0.0531924	DLC1, IFT57, F3, CYCS, DIABLO, HSPE1, HSPA5, HBXIP, IFI6	710	82	14116	2.18214	1	0.531245	62.6384
GOTERM_BP_ALL	GO:0055065~metal ion homeostasis	17	2.02622	0.0536875	CCL2, IL6ST, HEXB, OXTR, CALR, FKBP1B, BUD31, ITPR1, AGTR1, CUL5, HSP90B1, ADM, APOE, CCR4, RYR3, RGN, NEDD4L	710	205	14116	1.64873	1	0.532995	62.9888
GOTERM_BP_ALL	GO:0051336~regulation of hydrolase activity	25	2.97974	0.0539809	DLC1, C13ORF18, LEPR, BUD31, FKBP1B, POT1, AGTR1, TBC1D15, HRH1, FNTA, MS4A2, DIABLO, RGN, HSPE1, MC3R, HSPA5, ANGPTL4, GNAT1, VAV3, CYCS, HOMER1, HBXIP, F3, IFT57, IFI6	710	337	14116	1.4749	1	0.533361	63.195
GOTERM_BP_ALL	GO:0012502~induction of programmed cell death	24	2.86055	0.0549702	DLC1, CFLAR, VAV3, CEBPB, TM2D1, BNIP3, MBD4, STK17A, CASP3, CUL5, EI24, RNF7, CASP4, NUPR1, TIAM2, APOE, HMOX1, ZNF443, DIABLO, BCL3, UBB, FAS, CASP1, PDCD6	710	321	14116	1.48648	1	0.538392	63.8821
GOTERM_BP_ALL	GO:0032268~regulation of cellular protein metabolic process	33	3.93325	0.0550228	DLC1, ZAK, IL6ST, PDGFA, EIF5, CPEB1, IGF2BP3, CALR, TIMP1, LIF, AGTR1, FNTA, APOE, PSMB3, PSMB2, BCL3, EIF1, TAF9, PSMD9, IL6, NDFIP1, PSMB8, UBE2N, CCNB1, PSMA1, PSMD14, PSMC6, PSMD13, PSMC2, UBB, PPP1R15A, EIF4E2, IGFBP5	710	474	14116	1.38417	1	0.537126	63.9183
GOTERM_BP_ALL	GO:0006958~complement activation, classical pathway	5	0.595948	0.0553154	MASP2, CD46, CRP, C1RL, CFI	710	29	14116	3.42788	1	0.537462	64.119
GOTERM_BP_ALL	GO:0050921~positive regulation of chemotaxis	5	0.595948	0.0553154	IL6, IL8, CCR4, F3, SCG2	710	29	14116	3.42788	1	0.537462	64.119
GOTERM_BP_ALL	GO:0051259~protein oligomerization	15	1.78784	0.0554866	GLRA1, PCBD1, ANXA5, SOD2, CTNNB1, TAF10, TRIM5, TNFRSF1A, GPX3, ILK, ANGPT1, FAS, PRNP, ANGPTL4, PARVA	710	174	14116	1.71394	1	0.536993	64.2359
GOTERM_BP_ALL	GO:0031347~regulation of defense response	13	1.54946	0.0562094	PVR, IL6, IL6ST, OSMR, AP2S1, NDFIP1, APOBEC3F, TNFRSF1A, AGTR1, MYD88, APOE, IRF7, PLA2G2A	710	143	14116	1.80743	1	0.54015	64.7257
GOTERM_BP_ALL	GO:0010543~regulation of platelet activation	3	0.357569	0.0576645	PDPN, PDGFA, APOE	710	8	14116	7.45563	1	0.547981	65.6926
GOTERM_BP_ALL	GO:0008631~induction of apoptosis by oxidative stress	3	0.357569	0.0576645	CASP3, RNF7, DIABLO	710	8	14116	7.45563	1	0.547981	65.6926
GOTERM_BP_ALL	GO:0051707~response to other organism	22	2.62217	0.0589752	IL6, CCL2, BNIP3, CCL8, IFI44, HBXIP, APOBEC3F, IFI35, ISG20, PLSCR1, TRIM5, TNFRSF1A, MYD88, CCL20, ADM, CCR4, IRF7, PLA2G2A, BCL3, SCARB1, PTX3, VLDLR	710	290	14116	1.50827	1	0.554716	66.542
GOTERM_BP_ALL	GO:0045768~positive regulation of anti-apoptosis	5	0.595948	0.061394	IL6, ADM, IL6ST, HMOX1, ANGPT1	710	30	14116	3.31362	1	0.56811	68.0576
GOTERM_BP_ALL	GO:0051270~regulation of cell motion	16	1.90703	0.0621215	DLC1, IL6, SP100, PDPN, PDGFA, IL6ST, ACTN1, APOE, HMOX1, RRAS2, F3, ILK, RRAS, SCARB1, TRIP6, IGFBP5	710	193	14116	1.64822	1	0.570928	68.5006
GOTERM_BP_ALL	GO:0007242~intracellular signaling cascade	76	9.0584	0.0628888	ZAK, IL6ST, PRDX4, BUD31, CTNNB1, TRIAP1, AGTR1, DIRAS3, TIAM2, APOE, HMOX1, RRAS, HTR5A, ARL1, SP100, PIK3C2A, RINT1, MBD4, ARHGAP29, STK3, TANK, NEK11, DOK3, APITD1, ADM, ITGB1BP1, RRAS2, ARL8B, GADD45B, ASB4, ARL4C, GRB14, CCL2, NMI, CNIH, NPY2R, HUS1, OXTR, ARF6, ARF5, GNG12, ABCA1, STK17A, CALR, TMED7, RASAL1, HRH1, KRAS, CNR2, MAS1, BCL3, MC3R, RNF14, SCG2, PDK1, VAV3, IL8, MET, ARFIP2, HOM…	710	1256	14116	1.20303	1	0.573945	68.9616
GOTERM_BP_ALL	GO:0002541~activation of plasma proteins involved in acute inflammatory response	6	0.715137	0.0629442	MASP2, F3, CD46, CRP, C1RL, CFI	710	43	14116	2.77419	1	0.572692	68.9946
GOTERM_BP_ALL	GO:0033365~protein localization in organelle	13	1.54946	0.0637769	GRPEL1, NUP98, SNUPN, TIMM10, ARNTL, TIMM44, TIMM8B, IPO7, SRPR, FXC1, BCL3, TNPO1, TOB1	710	146	14116	1.77029	1	0.576053	69.4872
GOTERM_BP_ALL	GO:0006753~nucleoside phosphate metabolic process	22	2.62217	0.0646479	DCTD, UPP1, ATP5F1, MBD4, KMO, ATP5G1, ATP13A3, GMPR, C9ORF95, ATP6V1D, ATP6V1C1, ATP2B1, NME5, TPI1, ADM, ATP5S, REXO2, DERA, ATP5L, GUK1, MDH2, PRPS2	710	293	14116	1.49282	1	0.579586	69.9944
GOTERM_BP_ALL	GO:0009117~nucleotide metabolic process	22	2.62217	0.0646479	DCTD, UPP1, ATP5F1, MBD4, KMO, ATP5G1, ATP13A3, GMPR, C9ORF95, ATP6V1D, ATP6V1C1, ATP2B1, NME5, TPI1, ADM, ATP5S, REXO2, DERA, ATP5L, GUK1, MDH2, PRPS2	710	293	14116	1.49282	1	0.579586	69.9944
GOTERM_BP_ALL	GO:0000041~transition metal ion transport	8	0.953516	0.0649547	STEAP3, SLC39A14, HFE, SLC30A5, CP, COX17, SLC31A1, FTL	710	71	14116	2.24019	1	0.579803	70.1712
GOTERM_BP_ALL	GO:0043065~positive regulation of apoptosis	30	3.57569	0.0651825	DLC1, ZAK, BNIP3, STK17A, CASP3, CUL5, CASP4, TIAM2, CD44, APOE, HMOX1, DIABLO, PPP3CC, ZNF443, BCL3, FAS, CASP1, CFLAR, VAV3, CEBPB, TM2D1, MBD4, STK3, DDIT3, EI24, RNF7, NUPR1, SMPD1, UBB, PDCD6	710	430	14116	1.38709	1	0.579562	70.3018
GOTERM_BP_ALL	GO:0048193~Golgi vesicle transport	12	1.43027	0.0653683	ARL1, COG5, AP1S1, SEC24A, COPB1, TRAPPC4, RER1, DNAJC6, SAR1B, YKT6, SEC24D, FTL	710	131	14116	1.82122	1	0.579081	70.408
GOTERM_BP_ALL	GO:0016043~cellular component organization	142	16.9249	0.0658962	S100A4, DLC1, S100A6, GRPEL1, TUBB2A, PDGFA, TSPAN4, CAPZA2, PDLIM3, MPV17, POSTN, CTNNB1, AGTR1, CD44, APOE, ILK, TGFBI, SH3BGR, DNAJC6, NUP37, LOX, FAS, SAR1B, PLS3, LRRC50, FTL, DARS, PCBD1, PDPN, ACTN1, WEE1, TIMM8B, HES1, LRP12, PLA2G2A, TRAPPC4, LAMC1, PMP22, IBSP, HSD17B12, SNX2, HFE, NEDD9, ARF6, ARPC4, SNX3, ARPC5, ABCA1, CALR, HOXA1, HOXA2, KRAS, FGA, OBSL1, SCARB1, TAF9, ANGPTL4, VAV3,…	710	2498	14116	1.13018	1	0.580566	70.7076
GOTERM_BP_ALL	GO:0048514~blood vessel morphogenesis	17	2.02622	0.0660927	IL8, TNFRSF12A, PDGFA, LEPR, TIPARP, MMP14, CTNNB1, ANXA2P2, ANXA2, MEOX2, APOE, HMOX1, ITGA7, ANGPT1, ANGPT2, ANGPTL4, SCG2	710	211	14116	1.60184	1	0.580148	70.8184
GOTERM_BP_ALL	GO:0051186~cofactor metabolic process	16	1.90703	0.066665	HMBS, ACACA, KMO, DLAT, C9ORF95, PIPOX, SOD2, MTHFS, ALAS1, CBR1, TPI1, HMOX1, SDHD, GPX3, LIAS, MDH2	710	195	14116	1.63132	1	0.581867	71.1388
GOTERM_BP_ALL	GO:0051605~protein maturation by peptide bond cleavage	9	1.07271	0.066761	MASP2, F3, CD46, CRP, C1RL, SPCS1, CFI, MMP14, PCSK5	710	86	14116	2.08064	1	0.580881	71.1922
GOTERM_BP_ALL	GO:0052547~regulation of peptidase activity	9	1.07271	0.066761	DLC1, IFT57, F3, CYCS, DIABLO, HSPE1, HSPA5, HBXIP, IFI6	710	86	14116	2.08064	1	0.580881	71.1922
GOTERM_BP_ALL	GO:0051345~positive regulation of hydrolase activity	15	1.78784	0.0669701	DLC1, CYCS, HOMER1, BUD31, POT1, AGTR1, HRH1, FNTA, IFT57, F3, DIABLO, RGN, MS4A2, HSPE1, MC3R	710	179	14116	1.66606	1	0.58054	71.3083
GOTERM_BP_ALL	GO:0016125~sterol metabolic process	10	1.1919	0.0671261	LEP, ACAA2, CYP27A1, LDLR, CYP51A1, APOE, LEPR, SCARB1, ABCA1, VLDLR	710	101	14116	1.96848	1	0.579902	71.3946
GOTERM_BP_ALL	GO:0050926~regulation of positive chemotaxis	4	0.476758	0.0671484	IL8, CCR4, F3, SCG2	710	19	14116	4.18562	1	0.578519	71.4069
GOTERM_BP_ALL	GO:0050927~positive regulation of positive chemotaxis	4	0.476758	0.0671484	IL8, CCR4, F3, SCG2	710	19	14116	4.18562	1	0.578519	71.4069
GOTERM_BP_ALL	GO:0009306~protein secretion	5	0.595948	0.06781	MS4A2, ABCA1, PDIA4, PCSK5, SCG2	710	31	14116	3.20672	1	0.580717	71.7699
GOTERM_BP_ALL	GO:0050920~regulation of chemotaxis	5	0.595948	0.06781	IL6, IL8, CCR4, F3, SCG2	710	31	14116	3.20672	1	0.580717	71.7699
GOTERM_BP_ALL	GO:0006879~cellular iron ion homeostasis	5	0.595948	0.06781	TFRC, NDFIP1, HFE, CP, FTL	710	31	14116	3.20672	1	0.580717	71.7699
GOTERM_BP_ALL	GO:0046165~alcohol biosynthetic process	6	0.715137	0.0682186	TPI1, ATF3, SDS, PCK2, PMM2, G6PC3	710	44	14116	2.71114	1	0.581488	71.992
GOTERM_BP_ALL	GO:0031669~cellular response to nutrient levels	6	0.715137	0.0682186	ATG12, HMOX1, LEPR, HFE, ASNS, HSPA5	710	44	14116	2.71114	1	0.581488	71.992
GOTERM_BP_ALL	GO:0001568~blood vessel development	19	2.2646	0.0683624	IL8, TNFRSF12A, PDGFA, LEPR, TIPARP, MMP14, CTNNB1, ANXA2P2, ANXA2, MEOX2, CD44, APOE, HMOX1, ITGA7, ANGPT1, LOX, ANGPT2, ANGPTL4, SCG2	710	245	14116	1.54185	1	0.580793	72.0697
GOTERM_BP_ALL	GO:0032269~negative regulation of cellular protein metabolic process	15	1.78784	0.0694429	IGF2BP3, CALR, PSMB8, TIMP1, PSMA1, PSMC6, PSMD14, PSMD13, PSMC2, PSMB3, PSMB2, TAF9, UBB, PSMD9, IGFBP5	710	180	14116	1.65681	1	0.585236	72.6475
GOTERM_BP_ALL	GO:0043068~positive regulation of programmed cell death	30	3.57569	0.0698088	DLC1, ZAK, BNIP3, STK17A, CASP3, CUL5, CASP4, TIAM2, CD44, APOE, HMOX1, DIABLO, PPP3CC, ZNF443, BCL3, FAS, CASP1, CFLAR, VAV3, CEBPB, TM2D1, MBD4, STK3, DDIT3, EI24, RNF7, NUPR1, SMPD1, UBB, PDCD6	710	433	14116	1.37748	1	0.585744	72.8405
GOTERM_BP_ALL	GO:0006469~negative regulation of protein kinase activity	9	1.07271	0.0704576	SPRY2, SPRY1, CASP3, RGS3, APOE, ILK, TRIB3, GADD45B, DUSP6	710	87	14116	2.05673	1	0.587774	73.1798
GOTERM_BP_ALL	GO:0048589~developmental growth	9	1.07271	0.0704576	CCNB1, CGA, FGA, SERPINE1, TBCE, GAP43, IGFBP5, PLAUR, HOXD11	710	87	14116	2.05673	1	0.587774	73.1798
GOTERM_BP_ALL	GO:0050817~coagulation	10	1.1919	0.070518	GGCX, PLSCR1, IL6, FGA, F3, EFEMP2, SERPINE1, TFPI, ANXA5, PLAUR	710	102	14116	1.94919	1	0.586628	73.2112
GOTERM_BP_ALL	GO:0007596~blood coagulation	10	1.1919	0.070518	GGCX, PLSCR1, IL6, FGA, F3, EFEMP2, SERPINE1, TFPI, ANXA5, PLAUR	710	102	14116	1.94919	1	0.586628	73.2112
GOTERM_BP_ALL	GO:0007007~inner mitochondrial membrane organization	3	0.357569	0.0717287	FXC1, TIMM10, TIMM8B	710	9	14116	6.62723	1	0.59162	73.8327
GOTERM_BP_ALL	GO:0010574~regulation of vascular endothelial growth factor production	3	0.357569	0.0717287	IL6, IL6ST, IL1A	710	9	14116	6.62723	1	0.59162	73.8327
GOTERM_BP_ALL	GO:0051000~positive regulation of nitric-oxide synthase activity	3	0.357569	0.0717287	KRAS, APOE, SCARB1	710	9	14116	6.62723	1	0.59162	73.8327
GOTERM_BP_ALL	GO:0010942~positive regulation of cell death	30	3.57569	0.0729836	DLC1, ZAK, BNIP3, STK17A, CASP3, CUL5, CASP4, TIAM2, CD44, APOE, HMOX1, DIABLO, PPP3CC, ZNF443, BCL3, FAS, CASP1, CFLAR, VAV3, CEBPB, TM2D1, MBD4, STK3, DDIT3, EI24, RNF7, NUPR1, SMPD1, UBB, PDCD6	710	435	14116	1.37115	1	0.596751	74.4626
GOTERM_BP_ALL	GO:0030384~phosphoinositide metabolic process	8	0.953516	0.0731787	PIGL, PIGG, PIK3C2A, PIGB, SYNJ2, SACM1L, PLAUR, PIGN	710	73	14116	2.17882	1	0.59631	74.5592
GOTERM_BP_ALL	GO:0002252~immune effector process	12	1.43027	0.0742506	IL6, MYD88, MASP2, SWAP70, CD46, CRP, C1RL, BCL3, BNIP3, FAS, CFI, PTX3	710	134	14116	1.78045	1	0.600397	75.0841
GOTERM_BP_ALL	GO:0042246~tissue regeneration	5	0.595948	0.0745578	CCNB1, FGA, SERPINE1, GAP43, PLAUR	710	32	14116	3.10651	1	0.600524	75.2326
GOTERM_BP_ALL	GO:0034367~macromolecular complex remodeling	4	0.476758	0.0761629	AGTR1, APOE, PLA2G2A, SCARB1	710	20	14116	3.97634	1	0.60721	75.995
GOTERM_BP_ALL	GO:0051181~cofactor transport	4	0.476758	0.0761629	SLC25A20, SLC25A32, PDPN, SLC22A5	710	20	14116	3.97634	1	0.60721	75.995
GOTERM_BP_ALL	GO:0034368~protein-lipid complex remodeling	4	0.476758	0.0761629	AGTR1, APOE, PLA2G2A, SCARB1	710	20	14116	3.97634	1	0.60721	75.995
GOTERM_BP_ALL	GO:0006044~N-acetylglucosamine metabolic process	4	0.476758	0.0761629	AMDHD2, HEXB, CHST2, SLC35A3	710	20	14116	3.97634	1	0.60721	75.995
GOTERM_BP_ALL	GO:0034369~plasma lipoprotein particle remodeling	4	0.476758	0.0761629	AGTR1, APOE, PLA2G2A, SCARB1	710	20	14116	3.97634	1	0.60721	75.995
GOTERM_BP_ALL	GO:0006041~glucosamine metabolic process	4	0.476758	0.0761629	AMDHD2, HEXB, CHST2, SLC35A3	710	20	14116	3.97634	1	0.60721	75.995
GOTERM_BP_ALL	GO:0009653~anatomical structure morphogenesis	72	8.58164	0.0765503	DLC1, CAST, HCCS, S100A4, S100A6, TUFT1, PDGFA, LMO4, LEPR, HOXD10, PEX7, CTNNB1, HOXD11, SPRY2, CD44, APOE, HMOX1, HOXC4, ILK, SERPINE1, ANGPT1, ANGPT2, LRRC50, PITX1, DLG1, PDPN, EFNB2, TBCE, LEF1, PCDH8, MMP14, BBS10, PLAUR, ANXA2P2, HES1, HOXC10, ADM, NRL, WNT11, UBB, LAMC1, PMP22, EXT2, GAP43, CCL2, TNFRSF12A, TIPARP, ARPC4, IGF2BP3, LIF, HOXA1, HOXA2, FGA, HOXA5, MAS1, OBSL1, PCSK5, PHLDA2,…	710	1197	14116	1.19589	1	0.607711	76.1756
GOTERM_BP_ALL	GO:0032956~regulation of actin cytoskeleton organization	9	1.07271	0.0782188	DLC1, ARPC3, PDGFA, ARPC2, CAPZA2, ILK, CAPG, ARF6, ARPC5	710	89	14116	2.01051	1	0.614527	76.9392
GOTERM_BP_ALL	GO:0030335~positive regulation of cell migration	9	1.07271	0.0782188	IL6, PDPN, PDGFA, IL6ST, F3, RRAS2, ILK, SCARB1, TRIP6	710	89	14116	2.01051	1	0.614527	76.9392
GOTERM_BP_ALL	GO:0048646~anatomical structure formation involved in morphogenesis	25	2.97974	0.0794194	CAST, DLC1, PDGFA, TNFRSF12A, LEPR, LMO4, CTNNB1, HOXA1, CD44, HMOX1, ILK, OBSL1, ANGPT1, ANGPT2, ANGPTL4, SCG2, IL8, LEF1, PCDH8, MMP14, ANXA2P2, ANXA2, MEOX2, PMP22, EXT2	710	352	14116	1.41205	1	0.618934	77.4743
GOTERM_BP_ALL	GO:0051493~regulation of cytoskeleton organization	12	1.43027	0.0805776	DLC1, DYNC1LI1, ARPC3, PDGFA, ARPC2, CAPZA2, ILK, CAPG, PSRC1, ARF6, ARPC5, CTNNB1	710	136	14116	1.75427	1	0.623064	77.9793
GOTERM_BP_ALL	GO:0001709~cell fate determination	5	0.595948	0.081631	HES1, HOXA2, MCL1, IFRD1, CTNNB1	710	33	14116	3.01238	1	0.626631	78.4293
GOTERM_BP_ALL	GO:0033673~negative regulation of kinase activity	9	1.07271	0.0822834	SPRY2, SPRY1, CASP3, RGS3, APOE, ILK, TRIB3, GADD45B, DUSP6	710	90	14116	1.98817	1	0.628277	78.7037
GOTERM_BP_ALL	GO:0006928~cell motion	32	3.81406	0.0824055	PVR, CCL2, TNFRSF12A, CXCL3, CAPZA2, ARF6, ARPC5, PEX7, CD97, HOXA1, HOXA2, ARPC3, CD44, ARPC2, SCARB1, MSN, SCG2, IL6, VAV3, IL8, MET, ARFIP2, ANXA1, MMP14, PLAUR, CCR4, ITGA5, ITGB1BP1, TXN, UBB, LAMC1, GAP43	710	475	14116	1.3394	1	0.627439	78.7547
GOTERM_BP_ALL	GO:0030334~regulation of cell migration	14	1.66865	0.083519	DLC1, IL6, PDGFA, IL6ST, PDPN, APOE, HMOX1, RRAS2, F3, ILK, RRAS, SCARB1, TRIP6, IGFBP5	710	169	14116	1.647	1	0.631196	79.2143
GOTERM_BP_ALL	GO:0007267~cell-cell signaling	39	4.64839	0.0838277	TUSC2, CGA, FGF5, CXCL5, GLRA1, GABRB2, PDGFA, NDP, CCL8, OXTR, FKBP1B, HOXD11, CTNNB1, CD97, SPRY2, SPRY1, HRH1, FNTA, SYPL1, CCL20, APOE, PCSK5, TAAR5, IL6, EFNB2, LIN7C, PCDH8, HOMER1, LEP, TNFAIP6, GRB10, CXCL14, APITD1, ADM, TXN, TFAP2C, UBB, PHEX, PMP22	710	600	14116	1.29231	1	0.631218	79.34
GOTERM_BP_ALL	GO:0030100~regulation of endocytosis	7	0.834327	0.0847705	AP2S1, ARF6, SCARB1, NEDD4L, CD63, CALR, PTX3	710	61	14116	2.28151	1	0.634128	79.7197
GOTERM_BP_ALL	GO:0001836~release of cytochrome c from mitochondria	4	0.476758	0.0856773	CASP3, CASP7, IFI6, SOD2	710	21	14116	3.78699	1	0.636836	80.0785
GOTERM_BP_ALL	GO:0006026~aminoglycan catabolic process	4	0.476758	0.0856773	GNS, CHI3L1, CHI3L2, CTBS	710	21	14116	3.78699	1	0.636836	80.0785
GOTERM_BP_ALL	GO:0015909~long-chain fatty acid transport	4	0.476758	0.0856773	SLC25A20, ANXA1, FABP3, PLA2G5	710	21	14116	3.78699	1	0.636836	80.0785
GOTERM_BP_ALL	GO:0050727~regulation of inflammatory response	8	0.953516	0.0866147	AGTR1, TNFRSF1A, IL6, OSMR, APOE, IL6ST, NDFIP1, PLA2G2A	710	76	14116	2.09281	1	0.639644	80.4432
GOTERM_BP_ALL	GO:0007005~mitochondrion organization	12	1.43027	0.087231	CASP3, GRPEL1, CASP7, FXC1, TIMM10, SYNJ2, MPV17, BNIP3, TIMM44, TIMM8B, IFI6, SOD2	710	138	14116	1.72884	1	0.640999	80.6796
GOTERM_BP_ALL	GO:0051248~negative regulation of protein metabolic process	15	1.78784	0.0884359	IGF2BP3, CALR, PSMB8, TIMP1, PSMA1, PSMC6, PSMD14, PSMD13, PSMC2, PSMB3, PSMB2, TAF9, UBB, PSMD9, IGFBP5	710	187	14116	1.59479	1	0.644913	81.1338
GOTERM_BP_ALL	GO:0007264~small GTPase mediated signal transduction	22	2.62217	0.0887708	PDK1, ARL1, VAV3, ARFIP2, ARF6, ABCA1, ARF5, ARHGAP29, TAX1BP3, RAB33B, NRAS, RAB32, DOK3, KRAS, DIRAS3, APOE, HMOX1, RRAS2, RHEB, RRAS, ARL8B, ARL4C	710	305	14116	1.43409	1	0.645005	81.2583
GOTERM_BP_ALL	GO:0048520~positive regulation of behavior	5	0.595948	0.089022	IL6, IL8, CCR4, F3, SCG2	710	34	14116	2.92378	1	0.644735	81.3511
GOTERM_BP_ALL	GO:0006626~protein targeting to mitochondrion	5	0.595948	0.089022	GRPEL1, FXC1, TIMM10, TIMM44, TIMM8B	710	34	14116	2.92378	1	0.644735	81.3511
GOTERM_BP_ALL	GO:0070585~protein localization in mitochondrion	5	0.595948	0.089022	GRPEL1, FXC1, TIMM10, TIMM44, TIMM8B	710	34	14116	2.92378	1	0.644735	81.3511
GOTERM_BP_ALL	GO:0006506~GPI anchor biosynthetic process	5	0.595948	0.089022	PIGL, PIGG, PIGB, PLAUR, PIGN	710	34	14116	2.92378	1	0.644735	81.3511
GOTERM_BP_ALL	GO:0016051~carbohydrate biosynthetic process	10	1.1919	0.0890534	TPI1, GBE1, ATF3, SDS, B3GALNT1, PCK2, EXT2, PMM2, G6PC3, HS2ST1	710	107	14116	1.8581	1	0.643516	81.3627
GOTERM_BP_ALL	GO:0051789~response to protein stimulus	10	1.1919	0.0890534	DERL2, FNTA, CCR4, HSPB7, HSPB2, HSPE1, CLIC1, FAS, PPP1R15A, DDIT3	710	107	14116	1.8581	1	0.643516	81.3627
GOTERM_BP_ALL	GO:0060348~bone development	11	1.31108	0.0903282	IBSP, HOXA2, TUFT1, WWTR1, MMP14, GPNMB, EXT2, IGFBP5, SPP1, PEX7, HOXD11	710	123	14116	1.77804	1	0.647646	81.8269
GOTERM_BP_ALL	GO:0032970~regulation of actin filament-based process	9	1.07271	0.0907799	DLC1, ARPC3, PDGFA, ARPC2, CAPZA2, ILK, CAPG, ARF6, ARPC5	710	92	14116	1.94495	1	0.648226	81.9888
GOTERM_BP_ALL	GO:0007599~hemostasis	10	1.1919	0.0930758	GGCX, PLSCR1, IL6, FGA, F3, EFEMP2, SERPINE1, TFPI, ANXA5, PLAUR	710	108	14116	1.8409	1	0.656518	82.7906
GOTERM_BP_ALL	GO:0006913~nucleocytoplasmic transport	13	1.54946	0.093691	XPOT, NUP98, NUP160, SNUPN, ARNTL, CALR, IPO7, MLX, BCL3, CAMK1, THOC7, TNPO1, TOB1	710	156	14116	1.65681	1	0.657727	82.9997
GOTERM_BP_ALL	GO:0006505~GPI anchor metabolic process	5	0.595948	0.0967224	PIGL, PIGG, PIGB, PLAUR, PIGN	710	35	14116	2.84024	1	0.668675	83.9952
GOTERM_BP_ALL	GO:0032879~regulation of localization	39	4.64839	0.0975381	DLC1, IL6ST, PDGFA, AP2S1, CRP, OXTR, ARF6, ABCA1, CALR, FKBP1B, LIF, AGTR1, APOE, HMOX1, ILK, MS4A2, RRAS, SLC30A5, BCL3, SCARB1, NEDD4L, PTX3, CASP1, IL1A, PSMD9, IL6, SP100, PDPN, NDFIP1, ACTN1, CD63, HOMER1, LEP, GRB10, RRAS2, F3, TRIP6, AACS, IGFBP5	710	610	14116	1.27112	1	0.670592	84.2536
GOTERM_BP_ALL	GO:0050878~regulation of body fluid levels	12	1.43027	0.0978244	GGCX, PLSCR1, IL6, FGA, F3, EFEMP2, SERPINE1, TFPI, ANXA5, ANXA2P2, PLAUR, ANXA2	710	141	14116	1.69206	1	0.670408	84.3433
GOTERM_BP_ALL	GO:0033210~leptin-mediated signaling pathway	2	0.238379	0.097934	LEP, LEPR	710	2	14116	19.8817	1	0.669531	84.3776
GOTERM_BP_ALL	GO:0006659~phosphatidylserine biosynthetic process	2	0.238379	0.097934	PTDSS1, PTDSS2	710	2	14116	19.8817	1	0.669531	84.3776
GOTERM_BP_ALL	GO:0033552~response to vitamin B3	2	0.238379	0.097934	CCL2, ANGPT1	710	2	14116	19.8817	1	0.669531	84.3776
GOTERM_BP_ALL	GO:0006351~transcription, DNA-dependent	21	2.50298	0.09863	TAF1B, POLR2H, COPS2, MAFF, SNAPC5, POLR2G, TRIP4, NMI, CEBPB, POLR2L, LMO4, POLR2C, DDIT3, POLR2A, GTF2H1, TAF10, MAX, NRL, IRF7, PIR, TAF9	710	292	14116	1.42985	1	0.670956	84.5933
Abbreviations: FDR: false discovery rate
