# Supplementary material for: Increased Microglia/Macrophage Gene Expression in a Subset of Adult and Pediatric Astrocytomas
Source: PLoS One. 2012 Aug 22;7(8):e43339. doi: 10.1371/journal.pone.0043339 (PMC3425586; doi:10.1371/journal.pone.0043339)
Supplement: Table S7 — Enrichment scores and statistics of cell-specific gene signatures from GSEA analysis of Cluster 3 (surrogate high microglia/macrophage) versus Cluster 2 (surrogate low microglia/macrophage) in adult GBM. (XLSX) [file pone.0043339.s013.xlsx]

## Sheet: Table S7
Table S7. Enrichment scores and statistics of cell-specific gene signatures from GSEA analysis of Cluster 3 (surrogate high microglia/macrophage) versus Cluster 2 (surrogate low microglia/macrophage) in adult GBM.
(A) Adult GBM (TCGA data portal, 2010): Cluster 3 (n=150) vs Cluster 2 (n=129)
NAME	SIZE	ES	NES	NOM p-val	FDR q-val	FWER p-val	RANK AT MAX	LEADING EDGE
T CD4 NAIVE	52	0.479521	1.62859	0.0222672	0.193651	0.127	4410	tags=58%, list=25%, signal=76%
MONOCYTES	76	0.46067	1.62607	0.0137255	0.0996916	0.131	3829	tags=41%, list=21%, signal=52%
M2 MACROPHAGES	57	0.526452	1.47006	0.116327	0.189004	0.29	3304	tags=53%, list=19%, signal=64%
M1 MACROPHAGES	68	0.493769	1.36568	0.207767	0.258455	0.439	3141	tags=41%, list=18%, signal=50%
GRANULOCYTES	73	0.353764	1.32586	0.127789	0.245602	0.492	3817	tags=37%, list=21%, signal=47%
GIM	140	0.368961	1.25519	0.23299	0.280794	0.606	4069	tags=35%, list=23%, signal=45%
T CD8 NAIVE	32	0.353354	1.23246	0.184971	0.264853	0.647	3929	tags=41%, list=22%, signal=52%
NAIVE T CELL	27	0.389159	1.12146	0.324153	0.349826	0.77	4697	tags=44%, list=26%, signal=60%
B CELL	59	0.25061	1.01717	0.458661	0.438784	0.862	4181	tags=29%, list=23%, signal=38%
HSC	249	0.232857	1.00176	0.442623	0.414914	0.876	3408	tags=26%, list=19%, signal=32%
NUC. ERYTHROCYTES	209	-0.190602	-0.856266	0.699443	0.624945	0.974	3301	tags=21%, list=19%, signal=25%
NK CELL	62	-0.267928	-0.975317	0.482692	0.604526	0.913	3031	tags=24%, list=17%, signal=29%
T CD8 ACTIVATED	48	-0.323497	-1.13726	0.289883	0.536438	0.757	4418	tags=40%, list=25%, signal=52%
T CD4 ACTIVATED	9	-0.625659	-1.41137	0.109127	0.322514	0.375	6587	tags=89%, list=37%, signal=141%
Abbreviations: ES: enrichment score; NES: normalized enrichment score; NOM p-val: nominal p-value; FDR q-val = false discovery rate q-value;
FWER p-val: Family-wise error rate p-value; GIM: glioma-infiltrating microglia/macrophage; HSC: hematopoietic stem cells
